# Supplementary material for: Stability of n-alkanes and n-perfluoroalkanes against horizontal displacement on a graphite surface
Source: Royal Society of Chemistry journal article supplement (doi:10.1039/d4cp02418d), 2024-01-01
Supplement: d4cp02418d2.pdf [file d4cp02418d2.pdf]

## XYZ coordinates of each optimized geometry on C<sub>96</sub>H<sub>24</sub>

### propane

| Center<br>Number | Atomic<br>Number | Atomic<br>Type | Coordinates (Angstroms) |           |           |
|------------------|------------------|----------------|-------------------------|-----------|-----------|
|                  |                  |                | X                       | Y         | Z         |
| 1                | 6                | 0              | 1.371714                | -0.036415 | -0.156720 |
| 2                | 6                | 0              | 0.628005                | -1.249807 | -0.150610 |
| 3                | 6                | 0              | -0.794620               | -1.212392 | -0.138536 |
| 4                | 6                | 0              | -1.473576               | 0.038377  | -0.132545 |
| 5                | 6                | 0              | -0.729833               | 1.251724  | -0.138685 |
| 6                | 6                | 0              | 0.692786                | 1.214369  | -0.150756 |
| 7                | 6                | 0              | 2.790494                | -0.073713 | -0.168769 |
| 8                | 6                | 0              | 1.305103                | -2.497195 | -0.156563 |
| 9                | 6                | 0              | -1.536319               | -2.422503 | -0.132434 |
| 10               | 6                | 0              | -2.892338               | 0.075669  | -0.120505 |
| 11               | 6                | 0              | -1.406953               | 2.499144  | -0.132718 |
| 12               | 6                | 0              | 1.434471                | 2.424458  | -0.156843 |
| 13               | 6                | 0              | 3.533524                | 1.140578  | -0.174876 |
| 14               | 6                | 0              | 3.468705                | -1.325365 | -0.174736 |
| 15               | 6                | 0              | 2.728185                | -2.533555 | -0.168650 |
| 16               | 6                | 0              | 0.560283                | -3.710392 | -0.150442 |
| 17               | 6                | 0              | -0.856261               | -3.673157 | -0.138412 |
| 18               | 6                | 0              | -2.959344               | -2.384051 | -0.120347 |
| 19               | 6                | 0              | -3.635369               | -1.138626 | -0.114404 |
| 20               | 6                | 0              | -3.570549               | 1.327318  | -0.114544 |
| 21               | 6                | 0              | -2.830030               | 2.535507  | -0.120631 |
| 22               | 6                | 0              | -0.662127               | 3.712345  | -0.138836 |
| 23               | 6                | 0              | 0.754417                | 3.675109  | -0.150868 |
| 24               | 6                | 0              | 2.857500                | 2.386003  | -0.168932 |
| 25               | 6                | 0              | 4.960363                | 1.102439  | -0.186995 |
| 26               | 6                | 0              | 4.895577                | -1.362240 | -0.186853 |
| 27               | 6                | 0              | 3.408575                | -3.788348 | -0.174632 |
| 28               | 6                | 0              | 1.241784                | -4.964582 | -0.156435 |
| 29               | 6                | 0              | -1.602711               | -4.889810 | -0.132278 |
| 30               | 6                | 0              | -3.704715               | -3.601366 | -0.114222 |
| 31               | 6                | 0              | -5.062207               | -1.100486 | -0.102286 |

|    |   |   |           |           |           |
|----|---|---|-----------|-----------|-----------|
| 32 | 6 | 0 | -4.997421 | 1.364192  | -0.102427 |
| 33 | 6 | 0 | -3.510419 | 3.790300  | -0.114648 |
| 34 | 6 | 0 | -1.343629 | 4.966534  | -0.132845 |
| 35 | 6 | 0 | 1.500866  | 4.891763  | -0.157002 |
| 36 | 6 | 0 | 3.602871  | 3.603318  | -0.175058 |
| 37 | 6 | 0 | 5.637308  | -0.148546 | -0.192948 |
| 38 | 6 | 0 | 2.663700  | -5.000114 | -0.168510 |
| 39 | 6 | 0 | -3.024530 | -4.850592 | -0.120203 |
| 40 | 6 | 0 | -5.739152 | 0.150499  | -0.096332 |
| 41 | 6 | 0 | -2.765545 | 5.002067  | -0.120770 |
| 42 | 6 | 0 | 2.922685  | 4.852544  | -0.169077 |
| 43 | 6 | 0 | 5.699650  | 2.314448  | -0.193069 |
| 44 | 6 | 0 | 5.570169  | -2.611415 | -0.192786 |
| 45 | 6 | 0 | 4.827810  | -3.822605 | -0.186685 |
| 46 | 6 | 0 | 0.497301  | -6.173406 | -0.150316 |
| 47 | 6 | 0 | -0.922762 | -6.136077 | -0.138256 |
| 48 | 6 | 0 | -5.123790 | -3.561015 | -0.102170 |
| 49 | 6 | 0 | -5.801494 | -2.312496 | -0.096211 |
| 50 | 6 | 0 | -5.672014 | 2.613367  | -0.096495 |
| 51 | 6 | 0 | -4.929654 | 3.824558  | -0.102595 |
| 52 | 6 | 0 | -0.599146 | 6.175358  | -0.138964 |
| 53 | 6 | 0 | 0.820917  | 6.138030  | -0.151024 |
| 54 | 6 | 0 | 5.021946  | 3.562967  | -0.187110 |
| 55 | 6 | 0 | 7.069562  | -0.186195 | -0.205111 |
| 56 | 6 | 0 | 3.347222  | -6.259351 | -0.174521 |
| 57 | 6 | 0 | -3.773262 | -6.072180 | -0.114050 |
| 58 | 6 | 0 | -7.171406 | 0.188147  | -0.084169 |
| 59 | 6 | 0 | -3.449066 | 6.261304  | -0.114759 |
| 60 | 6 | 0 | 3.671417  | 6.074133  | -0.175231 |
| 61 | 6 | 0 | 7.137042  | 2.267826  | -0.205278 |
| 62 | 6 | 0 | 7.008026  | -2.640372 | -0.204995 |
| 63 | 6 | 0 | 5.506130  | -5.090780 | -0.192653 |
| 64 | 6 | 0 | 1.191151  | -7.433149 | -0.156414 |
| 65 | 6 | 0 | -1.681834 | -7.357629 | -0.132015 |
| 66 | 6 | 0 | -5.867797 | -4.791801 | -0.096059 |
| 67 | 6 | 0 | -7.238886 | -2.265873 | -0.084002 |
| 68 | 6 | 0 | -7.109870 | 2.642324  | -0.084285 |
| 69 | 6 | 0 | -5.607974 | 5.092732  | -0.096628 |

|     |   |   |           |           |           |
|-----|---|---|-----------|-----------|-----------|
| 70  | 6 | 0 | -1.292995 | 7.435102  | -0.132866 |
| 71  | 6 | 0 | 1.579990  | 7.359582  | -0.157265 |
| 72  | 6 | 0 | 5.765953  | 4.793754  | -0.193221 |
| 73  | 6 | 0 | 7.782748  | 1.037190  | -0.210962 |
| 74  | 6 | 0 | 7.717492  | -1.445358 | -0.210819 |
| 75  | 6 | 0 | 4.763258  | -6.265317 | -0.186541 |
| 76  | 6 | 0 | 2.580758  | -7.450079 | -0.168212 |
| 77  | 6 | 0 | -3.070412 | -7.301531 | -0.120219 |
| 78  | 6 | 0 | -5.187656 | -6.003745 | -0.102033 |
| 79  | 6 | 0 | -7.884592 | -1.035237 | -0.078318 |
| 80  | 6 | 0 | -7.819337 | 1.447311  | -0.078461 |
| 81  | 6 | 0 | -4.865103 | 6.267270  | -0.102739 |
| 82  | 6 | 0 | -2.682603 | 7.452032  | -0.121068 |
| 83  | 6 | 0 | 2.968568  | 7.303484  | -0.169061 |
| 84  | 6 | 0 | 5.085812  | 6.005697  | -0.187248 |
| 85  | 6 | 0 | 7.855101  | 3.519467  | -0.211166 |
| 86  | 6 | 0 | 7.659339  | -3.928008 | -0.210737 |
| 87  | 6 | 0 | 6.949072  | -5.086838 | -0.204900 |
| 88  | 6 | 0 | 0.401721  | -8.641043 | -0.149913 |
| 89  | 6 | 0 | -0.956951 | -8.605329 | -0.138374 |
| 90  | 6 | 0 | -7.308540 | -4.712058 | -0.083816 |
| 91  | 6 | 0 | -7.956946 | -3.517514 | -0.078115 |
| 92  | 6 | 0 | -7.761183 | 3.929961  | -0.078543 |
| 93  | 6 | 0 | -7.050917 | 5.088791  | -0.084380 |
| 94  | 6 | 0 | -0.503565 | 8.642996  | -0.139367 |
| 95  | 6 | 0 | 0.855107  | 8.607281  | -0.150906 |
| 96  | 6 | 0 | 7.206696  | 4.714011  | -0.205464 |
| 97  | 1 | 0 | 8.870311  | 1.007751  | -0.220199 |
| 98  | 1 | 0 | 8.805100  | -1.473096 | -0.220056 |
| 99  | 1 | 0 | 5.281544  | -7.221928 | -0.191099 |
| 100 | 1 | 0 | 3.100540  | -8.405878 | -0.172782 |
| 101 | 1 | 0 | -3.639688 | -8.228702 | -0.115540 |
| 102 | 1 | 0 | -5.755482 | -6.931805 | -0.097366 |
| 103 | 1 | 0 | -8.972155 | -1.005798 | -0.069081 |
| 104 | 1 | 0 | -8.906944 | 1.475049  | -0.069224 |
| 105 | 1 | 0 | -5.383389 | 7.223880  | -0.098181 |
| 106 | 1 | 0 | -3.202384 | 8.407830  | -0.116498 |
| 107 | 1 | 0 | 3.537844  | 8.230655  | -0.173740 |

|     |   |   |           |           |           |
|-----|---|---|-----------|-----------|-----------|
| 108 | 1 | 0 | 5.653638  | 6.933758  | -0.191914 |
| 109 | 1 | 0 | 8.941842  | 3.485847  | -0.220396 |
| 110 | 1 | 0 | 8.746345  | -3.951528 | -0.219968 |
| 111 | 1 | 0 | 7.463327  | -6.044827 | -0.209424 |
| 112 | 1 | 0 | 0.924855  | -9.594212 | -0.154511 |
| 113 | 1 | 0 | -1.529437 | -9.529698 | -0.133668 |
| 114 | 1 | 0 | -7.872413 | -5.641707 | -0.079184 |
| 115 | 1 | 0 | -9.043687 | -3.483894 | -0.068885 |
| 116 | 1 | 0 | -8.848189 | 3.953481  | -0.069313 |
| 117 | 1 | 0 | -7.565171 | 6.046780  | -0.079857 |
| 118 | 1 | 0 | -1.026699 | 9.596165  | -0.134769 |
| 119 | 1 | 0 | 1.427593  | 9.531650  | -0.155612 |
| 120 | 1 | 0 | 7.770568  | 5.643660  | -0.210096 |
| 121 | 6 | 0 | 0.586493  | -0.007505 | 3.325148  |
| 122 | 6 | 0 | 1.469818  | 1.244328  | 3.342581  |
| 123 | 6 | 0 | 1.401513  | -1.302975 | 3.345479  |
| 124 | 1 | 0 | -0.096226 | 0.014118  | 4.185923  |
| 125 | 1 | 0 | -0.050533 | 0.010232  | 2.432954  |
| 126 | 1 | 0 | 0.870773  | 2.160705  | 3.291779  |
| 127 | 1 | 0 | 2.075806  | 1.286565  | 4.256337  |
| 128 | 1 | 0 | 2.157033  | 1.249397  | 2.489284  |
| 129 | 1 | 0 | 0.756202  | -2.188402 | 3.297382  |
| 130 | 1 | 0 | 2.005463  | -1.374623 | 4.258969  |
| 131 | 1 | 0 | 2.087830  | -1.346851 | 2.492163  |

---

***n*-pentane**

---

| Center<br>Number | Atomic<br>Number | Atomic<br>Type | Coordinates (Angstroms) |           |           |
|------------------|------------------|----------------|-------------------------|-----------|-----------|
|                  |                  |                | X                       | Y         | Z         |
| 1                | 6                | 0              | -0.229180               | -1.359899 | 0.000000  |
| 2                | 6                | 0              | -0.229180               | -0.648299 | 1.232527  |
| 3                | 6                | 0              | -0.229180               | 0.774901  | 1.232527  |
| 4                | 6                | 0              | -0.229180               | 1.486501  | 0.000000  |
| 5                | 6                | 0              | -0.229180               | 0.774901  | -1.232527 |
| 6                | 6                | 0              | -0.229180               | -0.648299 | -1.232527 |

|    |   |   |           |           |           |
|----|---|---|-----------|-----------|-----------|
| 7  | 6 | 0 | -0.229180 | -2.779199 | 0.000000  |
| 8  | 6 | 0 | -0.229180 | -1.357949 | 2.461677  |
| 9  | 6 | 0 | -0.229180 | 1.484551  | 2.461677  |
| 10 | 6 | 0 | -0.229180 | 2.905801  | 0.000000  |
| 11 | 6 | 0 | -0.229180 | 1.484551  | -2.461677 |
| 12 | 6 | 0 | -0.229180 | -1.357949 | -2.461677 |
| 13 | 6 | 0 | -0.229180 | -3.490091 | -1.233398 |
| 14 | 6 | 0 | -0.229180 | -3.490091 | 1.233398  |
| 15 | 6 | 0 | -0.229180 | -2.781548 | 2.460629  |
| 16 | 6 | 0 | -0.229180 | -0.645241 | 3.694026  |
| 17 | 6 | 0 | -0.229180 | 0.771843  | 3.694026  |
| 18 | 6 | 0 | -0.229180 | 2.908151  | 2.460629  |
| 19 | 6 | 0 | -0.229180 | 3.616693  | 1.233398  |
| 20 | 6 | 0 | -0.229180 | 3.616693  | -1.233398 |
| 21 | 6 | 0 | -0.229180 | 2.908151  | -2.460629 |
| 22 | 6 | 0 | -0.229180 | 0.771843  | -3.694026 |
| 23 | 6 | 0 | -0.229180 | -0.645241 | -3.694026 |
| 24 | 6 | 0 | -0.229180 | -2.781548 | -2.460629 |
| 25 | 6 | 0 | -0.229180 | -4.917490 | -1.232765 |
| 26 | 6 | 0 | -0.229180 | -4.917490 | 1.232765  |
| 27 | 6 | 0 | -0.229180 | -3.494700 | 3.697110  |
| 28 | 6 | 0 | -0.229180 | -1.359489 | 4.929875  |
| 29 | 6 | 0 | -0.229180 | 1.486091  | 4.929875  |
| 30 | 6 | 0 | -0.229180 | 3.621303  | 3.697110  |
| 31 | 6 | 0 | -0.229180 | 5.044093  | 1.232765  |
| 32 | 6 | 0 | -0.229180 | 5.044093  | -1.232765 |
| 33 | 6 | 0 | -0.229180 | 3.621303  | -3.697110 |
| 34 | 6 | 0 | -0.229180 | 1.486091  | -4.929875 |
| 35 | 6 | 0 | -0.229180 | -1.359489 | -4.929875 |
| 36 | 6 | 0 | -0.229180 | -3.494700 | -3.697110 |
| 37 | 6 | 0 | -0.229180 | -5.627099 | 0.000000  |
| 38 | 6 | 0 | -0.229180 | -2.781899 | 4.928031  |
| 39 | 6 | 0 | -0.229180 | 2.908501  | 4.928031  |
| 40 | 6 | 0 | -0.229180 | 5.753701  | 0.000000  |
| 41 | 6 | 0 | -0.229180 | 2.908501  | -4.928031 |
| 42 | 6 | 0 | -0.229180 | -2.781899 | -4.928031 |
| 43 | 6 | 0 | -0.229180 | -5.624699 | -2.463782 |
| 44 | 6 | 0 | -0.229180 | -5.624699 | 2.463782  |

|    |   |   |           |           |           |
|----|---|---|-----------|-----------|-----------|
| 45 | 6 | 0 | -0.229180 | -4.914397 | 3.694062  |
| 46 | 6 | 0 | -0.229180 | -0.647001 | 6.157844  |
| 47 | 6 | 0 | -0.229180 | 0.773604  | 6.157844  |
| 48 | 6 | 0 | -0.229180 | 5.040999  | 3.694062  |
| 49 | 6 | 0 | -0.229180 | 5.751302  | 2.463782  |
| 50 | 6 | 0 | -0.229180 | 5.751302  | -2.463782 |
| 51 | 6 | 0 | -0.229180 | 5.040999  | -3.694062 |
| 52 | 6 | 0 | -0.229180 | 0.773604  | -6.157844 |
| 53 | 6 | 0 | -0.229180 | -0.647001 | -6.157844 |
| 54 | 6 | 0 | -0.229180 | -4.914397 | -3.694062 |
| 55 | 6 | 0 | -0.229180 | -7.059899 | 0.000000  |
| 56 | 6 | 0 | -0.229180 | -3.498299 | 6.168872  |
| 57 | 6 | 0 | -0.229180 | 3.624901  | 6.168872  |
| 58 | 6 | 0 | -0.229180 | 7.186501  | 0.000000  |
| 59 | 6 | 0 | -0.229180 | 3.624901  | -6.168872 |
| 60 | 6 | 0 | -0.229180 | -3.498299 | -6.168872 |
| 61 | 6 | 0 | -0.229180 | -7.062872 | -2.454947 |
| 62 | 6 | 0 | -0.229180 | -7.062872 | 2.454947  |
| 63 | 6 | 0 | -0.229180 | -5.625832 | 4.943974  |
| 64 | 6 | 0 | -0.229180 | -1.373739 | 7.398921  |
| 65 | 6 | 0 | -0.229180 | 1.500342  | 7.398921  |
| 66 | 6 | 0 | -0.229180 | 5.752434  | 4.943974  |
| 67 | 6 | 0 | -0.229180 | 7.189475  | 2.454947  |
| 68 | 6 | 0 | -0.229180 | 7.189475  | -2.454947 |
| 69 | 6 | 0 | -0.229180 | 5.752434  | -4.943974 |
| 70 | 6 | 0 | -0.229180 | 1.500342  | -7.398921 |
| 71 | 6 | 0 | -0.229180 | -1.373739 | -7.398921 |
| 72 | 6 | 0 | -0.229180 | -5.625832 | -4.943974 |
| 73 | 6 | 0 | -0.229180 | -7.740717 | -1.241703 |
| 74 | 6 | 0 | -0.229180 | -7.740717 | 1.241703  |
| 75 | 6 | 0 | -0.229180 | -4.914054 | 6.137627  |
| 76 | 6 | 0 | -0.229180 | -2.763362 | 7.379329  |
| 77 | 6 | 0 | -0.229180 | 2.889964  | 7.379329  |
| 78 | 6 | 0 | -0.229180 | 5.040656  | 6.137627  |
| 79 | 6 | 0 | -0.229180 | 7.867320  | 1.241703  |
| 80 | 6 | 0 | -0.229180 | 7.867320  | -1.241703 |
| 81 | 6 | 0 | -0.229180 | 5.040656  | -6.137627 |
| 82 | 6 | 0 | -0.229180 | 2.889964  | -7.379329 |

|     |   |   |           |           |           |
|-----|---|---|-----------|-----------|-----------|
| 83  | 6 | 0 | -0.229180 | -2.763362 | -7.379329 |
| 84  | 6 | 0 | -0.229180 | -4.914054 | -6.137627 |
| 85  | 6 | 0 | -0.229180 | -7.747820 | -3.725024 |
| 86  | 6 | 0 | -0.229180 | -7.747820 | 3.725024  |
| 87  | 6 | 0 | -0.229180 | -7.068224 | 4.902117  |
| 88  | 6 | 0 | -0.229180 | -0.616294 | 8.627141  |
| 89  | 6 | 0 | -0.229180 | 0.742896  | 8.627141  |
| 90  | 6 | 0 | -0.229180 | 7.194827  | 4.902117  |
| 91  | 6 | 0 | -0.229180 | 7.874422  | 3.725024  |
| 92  | 6 | 0 | -0.229180 | 7.874422  | -3.725024 |
| 93  | 6 | 0 | -0.229180 | 7.194827  | -4.902117 |
| 94  | 6 | 0 | -0.229180 | 0.742896  | -8.627141 |
| 95  | 6 | 0 | -0.229180 | -0.616294 | -8.627141 |
| 96  | 6 | 0 | -0.229180 | -7.068224 | -4.902117 |
| 97  | 1 | 0 | -0.229180 | -8.828717 | -1.240852 |
| 98  | 1 | 0 | -0.229180 | -8.828717 | 1.240852  |
| 99  | 1 | 0 | -0.229180 | -5.457317 | 7.080287  |
| 100 | 1 | 0 | -0.229180 | -3.308098 | 8.321139  |
| 101 | 1 | 0 | -0.229180 | 3.434701  | 8.321139  |
| 102 | 1 | 0 | -0.229180 | 5.583920  | 7.080287  |
| 103 | 1 | 0 | -0.229180 | 8.955319  | 1.240852  |
| 104 | 1 | 0 | -0.229180 | 8.955319  | -1.240852 |
| 105 | 1 | 0 | -0.229180 | 5.583920  | -7.080287 |
| 106 | 1 | 0 | -0.229180 | 3.434701  | -8.321139 |
| 107 | 1 | 0 | -0.229180 | -3.308098 | -8.321139 |
| 108 | 1 | 0 | -0.229180 | -5.457317 | -7.080287 |
| 109 | 1 | 0 | -0.229180 | -8.835108 | -3.719972 |
| 110 | 1 | 0 | -0.229180 | -8.835108 | 3.719972  |
| 111 | 1 | 0 | -0.229180 | -7.607494 | 5.846262  |
| 112 | 1 | 0 | -0.229180 | -1.164313 | 9.566234  |
| 113 | 1 | 0 | -0.229180 | 1.290915  | 9.566234  |
| 114 | 1 | 0 | -0.229180 | 7.734096  | 5.846262  |
| 115 | 1 | 0 | -0.229180 | 8.961710  | 3.719972  |
| 116 | 1 | 0 | -0.229180 | 8.961710  | -3.719972 |
| 117 | 1 | 0 | -0.229180 | 7.734096  | -5.846262 |
| 118 | 1 | 0 | -0.229180 | 1.290915  | -9.566234 |
| 119 | 1 | 0 | -0.229180 | -1.164313 | -9.566234 |
| 120 | 1 | 0 | -0.229180 | -7.607494 | -5.846262 |

|     |   |   |          |           |           |
|-----|---|---|----------|-----------|-----------|
| 121 | 6 | 0 | 3.293168 | -0.590422 | 0.000000  |
| 122 | 6 | 0 | 3.267250 | -1.430493 | -1.281808 |
| 123 | 6 | 0 | 3.267250 | -1.430493 | 1.281808  |
| 124 | 6 | 0 | 3.272577 | -0.577498 | -2.553685 |
| 125 | 6 | 0 | 3.272577 | -0.577498 | 2.553685  |
| 126 | 1 | 0 | 4.188433 | 0.049806  | 0.000000  |
| 127 | 1 | 0 | 2.432559 | 0.092776  | 0.000000  |
| 128 | 1 | 0 | 4.130631 | -2.111322 | -1.288350 |
| 129 | 1 | 0 | 2.375926 | -2.070360 | -1.273646 |
| 130 | 1 | 0 | 2.375926 | -2.070360 | 1.273646  |
| 131 | 1 | 0 | 4.130631 | -2.111322 | 1.288350  |
| 132 | 1 | 0 | 4.186589 | 0.025802  | -2.620275 |
| 133 | 1 | 0 | 2.420559 | 0.110720  | -2.567112 |
| 134 | 1 | 0 | 3.211251 | -1.197277 | -3.455605 |
| 135 | 1 | 0 | 2.420559 | 0.110720  | 2.567112  |
| 136 | 1 | 0 | 4.186589 | 0.025802  | 2.620275  |
| 137 | 1 | 0 | 3.211251 | -1.197277 | 3.455605  |

---

### *n*-heptane

---

| Center<br>Number | Atomic<br>Number | Atomic<br>Type | Coordinates (Angstroms) |           |           |
|------------------|------------------|----------------|-------------------------|-----------|-----------|
|                  |                  |                | X                       | Y         | Z         |
| 1                | 6                | 0              | -0.309359               | -1.324755 | 0.000000  |
| 2                | 6                | 0              | -0.309359               | -0.613155 | 1.232527  |
| 3                | 6                | 0              | -0.309359               | 0.810045  | 1.232527  |
| 4                | 6                | 0              | -0.309359               | 1.521645  | 0.000000  |
| 5                | 6                | 0              | -0.309359               | 0.810045  | -1.232527 |
| 6                | 6                | 0              | -0.309359               | -0.613155 | -1.232527 |
| 7                | 6                | 0              | -0.309359               | -2.744055 | 0.000000  |
| 8                | 6                | 0              | -0.309359               | -1.322805 | 2.461677  |
| 9                | 6                | 0              | -0.309359               | 1.519695  | 2.461677  |
| 10               | 6                | 0              | -0.309359               | 2.940945  | 0.000000  |
| 11               | 6                | 0              | -0.309359               | 1.519695  | -2.461677 |
| 12               | 6                | 0              | -0.309359               | -1.322805 | -2.461677 |
| 13               | 6                | 0              | -0.309359               | -3.454947 | -1.233398 |



|    |   |   |           |           |           |
|----|---|---|-----------|-----------|-----------|
| 14 | 6 | 0 | -0.309359 | -3.454947 | 1.233398  |
| 15 | 6 | 0 | -0.309359 | -2.746405 | 2.460629  |
| 16 | 6 | 0 | -0.309359 | -0.610097 | 3.694026  |
| 17 | 6 | 0 | -0.309359 | 0.806987  | 3.694026  |
| 18 | 6 | 0 | -0.309359 | 2.943295  | 2.460629  |
| 19 | 6 | 0 | -0.309359 | 3.651837  | 1.233398  |
| 20 | 6 | 0 | -0.309359 | 3.651837  | -1.233398 |
| 21 | 6 | 0 | -0.309359 | 2.943295  | -2.460629 |
| 22 | 6 | 0 | -0.309359 | 0.806987  | -3.694026 |
| 23 | 6 | 0 | -0.309359 | -0.610097 | -3.694026 |
| 24 | 6 | 0 | -0.309359 | -2.746405 | -2.460629 |
| 25 | 6 | 0 | -0.309359 | -4.882347 | -1.232765 |
| 26 | 6 | 0 | -0.309359 | -4.882347 | 1.232765  |
| 27 | 6 | 0 | -0.309359 | -3.459557 | 3.697110  |
| 28 | 6 | 0 | -0.309359 | -1.324345 | 4.929875  |
| 29 | 6 | 0 | -0.309359 | 1.521235  | 4.929875  |
| 30 | 6 | 0 | -0.309359 | 3.656446  | 3.697110  |
| 31 | 6 | 0 | -0.309359 | 5.079237  | 1.232765  |
| 32 | 6 | 0 | -0.309359 | 5.079237  | -1.232765 |
| 33 | 6 | 0 | -0.309359 | 3.656446  | -3.697110 |
| 34 | 6 | 0 | -0.309359 | 1.521235  | -4.929875 |
| 35 | 6 | 0 | -0.309359 | -1.324345 | -4.929875 |
| 36 | 6 | 0 | -0.309359 | -3.459557 | -3.697110 |
| 37 | 6 | 0 | -0.309359 | -5.591955 | 0.000000  |
| 38 | 6 | 0 | -0.309359 | -2.746755 | 4.928031  |
| 39 | 6 | 0 | -0.309359 | 2.943645  | 4.928031  |
| 40 | 6 | 0 | -0.309359 | 5.788845  | 0.000000  |
| 41 | 6 | 0 | -0.309359 | 2.943645  | -4.928031 |
| 42 | 6 | 0 | -0.309359 | -2.746755 | -4.928031 |
| 43 | 6 | 0 | -0.309359 | -5.589556 | -2.463782 |
| 44 | 6 | 0 | -0.309359 | -5.589556 | 2.463782  |
| 45 | 6 | 0 | -0.309359 | -4.879253 | 3.694062  |
| 46 | 6 | 0 | -0.309359 | -0.611857 | 6.157844  |
| 47 | 6 | 0 | -0.309359 | 0.808747  | 6.157844  |
| 48 | 6 | 0 | -0.309359 | 5.076143  | 3.694062  |
| 49 | 6 | 0 | -0.309359 | 5.786445  | 2.463782  |
| 50 | 6 | 0 | -0.309359 | 5.786445  | -2.463782 |
| 51 | 6 | 0 | -0.309359 | 5.076143  | -3.694062 |

|    |   |   |           |           |           |
|----|---|---|-----------|-----------|-----------|
| 52 | 6 | 0 | -0.309359 | 0.808747  | -6.157844 |
| 53 | 6 | 0 | -0.309359 | -0.611857 | -6.157844 |
| 54 | 6 | 0 | -0.309359 | -4.879253 | -3.694062 |
| 55 | 6 | 0 | -0.309359 | -7.024755 | 0.000000  |
| 56 | 6 | 0 | -0.309359 | -3.463155 | 6.168872  |
| 57 | 6 | 0 | -0.309359 | 3.660045  | 6.168872  |
| 58 | 6 | 0 | -0.309359 | 7.221645  | 0.000000  |
| 59 | 6 | 0 | -0.309359 | 3.660045  | -6.168872 |
| 60 | 6 | 0 | -0.309359 | -3.463155 | -6.168872 |
| 61 | 6 | 0 | -0.309359 | -7.027729 | -2.454947 |
| 62 | 6 | 0 | -0.309359 | -7.027729 | 2.454947  |
| 63 | 6 | 0 | -0.309359 | -5.590688 | 4.943974  |
| 64 | 6 | 0 | -0.309359 | -1.338596 | 7.398921  |
| 65 | 6 | 0 | -0.309359 | 1.535485  | 7.398921  |
| 66 | 6 | 0 | -0.309359 | 5.787578  | 4.943974  |
| 67 | 6 | 0 | -0.309359 | 7.224618  | 2.454947  |
| 68 | 6 | 0 | -0.309359 | 7.224618  | -2.454947 |
| 69 | 6 | 0 | -0.309359 | 5.787578  | -4.943974 |
| 70 | 6 | 0 | -0.309359 | 1.535485  | -7.398921 |
| 71 | 6 | 0 | -0.309359 | -1.338596 | -7.398921 |
| 72 | 6 | 0 | -0.309359 | -5.590688 | -4.943974 |
| 73 | 6 | 0 | -0.309359 | -7.705573 | -1.241703 |
| 74 | 6 | 0 | -0.309359 | -7.705573 | 1.241703  |
| 75 | 6 | 0 | -0.309359 | -4.878910 | 6.137627  |
| 76 | 6 | 0 | -0.309359 | -2.728218 | 7.379329  |
| 77 | 6 | 0 | -0.309359 | 2.925108  | 7.379329  |
| 78 | 6 | 0 | -0.309359 | 5.075800  | 6.137627  |
| 79 | 6 | 0 | -0.309359 | 7.902463  | 1.241703  |
| 80 | 6 | 0 | -0.309359 | 7.902463  | -1.241703 |
| 81 | 6 | 0 | -0.309359 | 5.075800  | -6.137627 |
| 82 | 6 | 0 | -0.309359 | 2.925108  | -7.379329 |
| 83 | 6 | 0 | -0.309359 | -2.728218 | -7.379329 |
| 84 | 6 | 0 | -0.309359 | -4.878910 | -6.137627 |
| 85 | 6 | 0 | -0.309359 | -7.712676 | -3.725024 |
| 86 | 6 | 0 | -0.309359 | -7.712676 | 3.725024  |
| 87 | 6 | 0 | -0.309359 | -7.033081 | 4.902117  |
| 88 | 6 | 0 | -0.309359 | -0.581150 | 8.627141  |
| 89 | 6 | 0 | -0.309359 | 0.778040  | 8.627141  |

|     |   |   |           |           |           |
|-----|---|---|-----------|-----------|-----------|
| 90  | 6 | 0 | -0.309359 | 7.229971  | 4.902117  |
| 91  | 6 | 0 | -0.309359 | 7.909566  | 3.725024  |
| 92  | 6 | 0 | -0.309359 | 7.909566  | -3.725024 |
| 93  | 6 | 0 | -0.309359 | 7.229971  | -4.902117 |
| 94  | 6 | 0 | -0.309359 | 0.778040  | -8.627141 |
| 95  | 6 | 0 | -0.309359 | -0.581150 | -8.627141 |
| 96  | 6 | 0 | -0.309359 | -7.033081 | -4.902117 |
| 97  | 1 | 0 | -0.309359 | -8.793573 | -1.240852 |
| 98  | 1 | 0 | -0.309359 | -8.793573 | 1.240852  |
| 99  | 1 | 0 | -0.309359 | -5.422173 | 7.080287  |
| 100 | 1 | 0 | -0.309359 | -3.272955 | 8.321139  |
| 101 | 1 | 0 | -0.309359 | 3.469845  | 8.321139  |
| 102 | 1 | 0 | -0.309359 | 5.619063  | 7.080287  |
| 103 | 1 | 0 | -0.309359 | 8.990463  | 1.240852  |
| 104 | 1 | 0 | -0.309359 | 8.990463  | -1.240852 |
| 105 | 1 | 0 | -0.309359 | 5.619063  | -7.080287 |
| 106 | 1 | 0 | -0.309359 | 3.469845  | -8.321139 |
| 107 | 1 | 0 | -0.309359 | -3.272955 | -8.321139 |
| 108 | 1 | 0 | -0.309359 | -5.422173 | -7.080287 |
| 109 | 1 | 0 | -0.309359 | -8.799964 | -3.719972 |
| 110 | 1 | 0 | -0.309359 | -8.799964 | 3.719972  |
| 111 | 1 | 0 | -0.309359 | -7.572350 | 5.846262  |
| 112 | 1 | 0 | -0.309359 | -1.129169 | 9.566234  |
| 113 | 1 | 0 | -0.309359 | 1.326059  | 9.566234  |
| 114 | 1 | 0 | -0.309359 | 7.769240  | 5.846262  |
| 115 | 1 | 0 | -0.309359 | 8.996854  | 3.719972  |
| 116 | 1 | 0 | -0.309359 | 8.996854  | -3.719972 |
| 117 | 1 | 0 | -0.309359 | 7.769240  | -5.846262 |
| 118 | 1 | 0 | -0.309359 | 1.326059  | -9.566234 |
| 119 | 1 | 0 | -0.309359 | -1.129169 | -9.566234 |
| 120 | 1 | 0 | -0.309359 | -7.572350 | -5.846262 |
| 121 | 6 | 0 | 3.212599  | -0.518682 | 0.000000  |
| 122 | 6 | 0 | 3.219501  | -1.360872 | -1.280009 |
| 123 | 6 | 0 | 3.219501  | -1.360872 | 1.280009  |
| 124 | 6 | 0 | 3.188457  | -0.521842 | -2.562227 |
| 125 | 6 | 0 | 3.188457  | -0.521842 | 2.562227  |
| 126 | 6 | 0 | 3.189515  | -1.375921 | -3.833276 |
| 127 | 6 | 0 | 3.189515  | -1.375921 | 3.833276  |

|     |   |   |          |           |           |
|-----|---|---|----------|-----------|-----------|
| 128 | 1 | 0 | 4.083586 | 0.153774  | 0.000000  |
| 129 | 1 | 0 | 2.327827 | 0.132142  | 0.000000  |
| 130 | 1 | 0 | 4.110193 | -2.007200 | -1.287756 |
| 131 | 1 | 0 | 2.354175 | -2.037818 | -1.272272 |
| 132 | 1 | 0 | 2.354175 | -2.037818 | 1.272272  |
| 133 | 1 | 0 | 4.110193 | -2.007200 | 1.287756  |
| 134 | 1 | 0 | 4.051541 | 0.159283  | -2.572651 |
| 135 | 1 | 0 | 2.297064 | 0.117773  | -2.550964 |
| 136 | 1 | 0 | 2.297064 | 0.117773  | 2.550964  |
| 137 | 1 | 0 | 4.051541 | 0.159283  | 2.572651  |
| 138 | 1 | 0 | 3.120630 | -0.757327 | -4.735469 |
| 139 | 1 | 0 | 2.340304 | -2.067516 | -3.841339 |
| 140 | 1 | 0 | 4.105543 | -1.975769 | -3.904180 |
| 141 | 1 | 0 | 3.120630 | -0.757327 | 4.735469  |
| 142 | 1 | 0 | 4.105543 | -1.975769 | 3.904180  |
| 143 | 1 | 0 | 2.340304 | -2.067516 | 3.841339  |

---

## fluoropropane

---

| Center<br>Number | Atomic<br>Number | Atomic<br>Type | Coordinates (Angstroms) |           |           |
|------------------|------------------|----------------|-------------------------|-----------|-----------|
|                  |                  |                | X                       | Y         | Z         |
| 1                | 6                | 0              | 1.249190                | 0.090046  | -0.575735 |
| 2                | 6                | 0              | 0.627841                | -1.190141 | -0.552360 |
| 3                | 6                | 0              | -0.790951               | -1.291757 | -0.505441 |
| 4                | 6                | 0              | -1.588394               | -0.113187 | -0.481897 |
| 5                | 6                | 0              | -0.967046               | 1.167000  | -0.505272 |
| 6                | 6                | 0              | 0.451746                | 1.268616  | -0.552191 |
| 7                | 6                | 0              | 2.664094                | 0.191384  | -0.622526 |
| 8                | 6                | 0              | 1.423100                | -2.365481 | -0.575839 |
| 9                | 6                | 0              | -1.410597               | -2.568436 | -0.482129 |
| 10               | 6                | 0              | -3.003298               | -0.214525 | -0.435106 |
| 11               | 6                | 0              | -1.762304               | 2.342340  | -0.481792 |
| 12               | 6                | 0              | 1.071392                | 2.545295  | -0.575502 |
| 13               | 6                | 0              | 3.284674                | 1.472388  | -0.645877 |
| 14               | 6                | 0              | 3.460894                | -0.988105 | -0.646046 |

|    |   |   |           |           |           |
|----|---|---|-----------|-----------|-----------|
| 15 | 6 | 0 | 2.842215  | -2.262791 | -0.622772 |
| 16 | 6 | 0 | 0.800634  | -3.645569 | -0.552427 |
| 17 | 6 | 0 | -0.612061 | -3.746749 | -0.505710 |
| 18 | 6 | 0 | -2.829862 | -2.669035 | -0.435197 |
| 19 | 6 | 0 | -3.623879 | -1.495529 | -0.411754 |
| 20 | 6 | 0 | -3.800098 | 0.964964  | -0.411585 |
| 21 | 6 | 0 | -3.181420 | 2.239649  | -0.434860 |
| 22 | 6 | 0 | -1.139838 | 3.622428  | -0.505204 |
| 23 | 6 | 0 | 0.272857  | 3.723608  | -0.551922 |
| 24 | 6 | 0 | 2.490658  | 2.645894  | -0.622435 |
| 25 | 6 | 0 | 4.707698  | 1.573673  | -0.692935 |
| 26 | 6 | 0 | 4.883827  | -0.885558 | -0.693104 |
| 27 | 6 | 0 | 3.641488  | -3.445194 | -0.646367 |
| 28 | 6 | 0 | 1.600954  | -4.827263 | -0.576059 |
| 29 | 6 | 0 | -1.235812 | -5.030437 | -0.482248 |
| 30 | 6 | 0 | -3.452475 | -3.953276 | -0.411771 |
| 31 | 6 | 0 | -5.046903 | -1.596814 | -0.364696 |
| 32 | 6 | 0 | -5.223032 | 0.862416  | -0.364527 |
| 33 | 6 | 0 | -3.980693 | 3.422052  | -0.411264 |
| 34 | 6 | 0 | -1.940159 | 4.804122  | -0.481572 |
| 35 | 6 | 0 | 0.896608  | 5.007296  | -0.575384 |
| 36 | 6 | 0 | 3.113271  | 3.930135  | -0.645861 |
| 37 | 6 | 0 | 5.503174  | 0.394724  | -0.716414 |
| 38 | 6 | 0 | 3.018827  | -4.723864 | -0.622952 |
| 39 | 6 | 0 | -2.653949 | -5.130158 | -0.435354 |
| 40 | 6 | 0 | -5.842378 | -0.417865 | -0.341218 |
| 41 | 6 | 0 | -3.358032 | 4.700723  | -0.434679 |
| 42 | 6 | 0 | 2.314744  | 5.107017  | -0.622277 |
| 43 | 6 | 0 | 5.324777  | 2.852040  | -0.716166 |
| 44 | 6 | 0 | 5.676786  | -2.062935 | -0.716503 |
| 45 | 6 | 0 | 5.056570  | -3.340787 | -0.693171 |
| 46 | 6 | 0 | 0.978395  | -6.102967 | -0.552654 |
| 47 | 6 | 0 | -0.437809 | -6.204398 | -0.505821 |
| 48 | 6 | 0 | -4.867993 | -4.051602 | -0.364967 |
| 49 | 6 | 0 | -5.663982 | -2.875181 | -0.341466 |
| 50 | 6 | 0 | -6.015990 | 2.039794  | -0.341128 |
| 51 | 6 | 0 | -5.395775 | 3.317646  | -0.364461 |
| 52 | 6 | 0 | -1.317600 | 6.079825  | -0.504977 |

|    |   |   |           |           |           |
|----|---|---|-----------|-----------|-----------|
| 53 | 6 | 0 | 0.098605  | 6.181257  | -0.551811 |
| 54 | 6 | 0 | 4.528788  | 4.028461  | -0.692665 |
| 55 | 6 | 0 | 6.931536  | 0.497026  | -0.763649 |
| 56 | 6 | 0 | 3.821650  | -5.910384 | -0.646655 |
| 57 | 6 | 0 | -3.279488 | -6.418980 | -0.411821 |
| 58 | 6 | 0 | -7.270740 | -0.520167 | -0.293982 |
| 59 | 6 | 0 | -4.160854 | 5.887243  | -0.410977 |
| 60 | 6 | 0 | 2.940284  | 6.395839  | -0.645810 |
| 61 | 6 | 0 | 6.759127  | 2.945912  | -0.763579 |
| 62 | 6 | 0 | 7.109873  | -1.951437 | -0.763915 |
| 63 | 6 | 0 | 5.855091  | -4.536710 | -0.716710 |
| 64 | 6 | 0 | 1.791541  | -7.288983 | -0.576698 |
| 65 | 6 | 0 | -1.073639 | -7.494193 | -0.481947 |
| 66 | 6 | 0 | -5.487934 | -5.349117 | -0.341598 |
| 67 | 6 | 0 | -7.098332 | -2.969054 | -0.294052 |
| 68 | 6 | 0 | -7.449077 | 1.928295  | -0.293716 |
| 69 | 6 | 0 | -6.194295 | 4.513568  | -0.340921 |
| 70 | 6 | 0 | -2.130745 | 7.265842  | -0.480934 |
| 71 | 6 | 0 | 0.734434  | 7.471051  | -0.575685 |
| 72 | 6 | 0 | 5.148730  | 5.325976  | -0.716033 |
| 73 | 6 | 0 | 7.521543  | 1.784166  | -0.786009 |
| 74 | 6 | 0 | 7.698948  | -0.692894 | -0.786179 |
| 75 | 6 | 0 | 5.230788  | -5.778134 | -0.693327 |
| 76 | 6 | 0 | 3.175460  | -7.170223 | -0.622509 |
| 77 | 6 | 0 | -2.460357 | -7.573871 | -0.436133 |
| 78 | 6 | 0 | -4.693091 | -6.488900 | -0.365145 |
| 79 | 6 | 0 | -7.860747 | -1.807308 | -0.271622 |
| 80 | 6 | 0 | -8.038153 | 0.669753  | -0.271452 |
| 81 | 6 | 0 | -5.569992 | 5.754992  | -0.364305 |
| 82 | 6 | 0 | -3.514664 | 7.147082  | -0.435123 |
| 83 | 6 | 0 | 2.121152  | 7.550729  | -0.621498 |
| 84 | 6 | 0 | 4.353886  | 6.465758  | -0.692486 |
| 85 | 6 | 0 | 7.351223  | 4.261650  | -0.786073 |
| 86 | 6 | 0 | 7.883429  | -3.169364 | -0.786583 |
| 87 | 6 | 0 | 7.290026  | -4.391973 | -0.764259 |
| 88 | 6 | 0 | 1.124181  | -8.568147 | -0.551811 |
| 89 | 6 | 0 | -0.230799 | -8.665194 | -0.507002 |
| 90 | 6 | 0 | -6.928850 | -5.410354 | -0.294043 |

|     |   |   |           |           |           |
|-----|---|---|-----------|-----------|-----------|
| 91  | 6 | 0 | -7.690428 | -4.284791 | -0.271558 |
| 92  | 6 | 0 | -8.222633 | 3.146223  | -0.271048 |
| 93  | 6 | 0 | -7.629230 | 4.368832  | -0.293372 |
| 94  | 6 | 0 | -1.463386 | 8.545006  | -0.505821 |
| 95  | 6 | 0 | -0.108405 | 8.642052  | -0.550630 |
| 96  | 6 | 0 | 6.589645  | 5.387213  | -0.763588 |
| 97  | 1 | 0 | 8.606233  | 1.861001  | -0.821878 |
| 98  | 1 | 0 | 8.783518  | -0.614363 | -0.822048 |
| 99  | 1 | 0 | 5.839709  | -6.679597 | -0.711301 |
| 100 | 1 | 0 | 3.785789  | -8.070733 | -0.640532 |
| 101 | 1 | 0 | -2.936126 | -8.552169 | -0.418239 |
| 102 | 1 | 0 | -5.167331 | -7.467941 | -0.347300 |
| 103 | 1 | 0 | -8.945438 | -1.884142 | -0.235754 |
| 104 | 1 | 0 | -9.122722 | 0.591221  | -0.235584 |
| 105 | 1 | 0 | -6.178913 | 6.656456  | -0.346330 |
| 106 | 1 | 0 | -4.124993 | 8.047592  | -0.417100 |
| 107 | 1 | 0 | 2.596922  | 8.529027  | -0.639392 |
| 108 | 1 | 0 | 4.828126  | 7.444800  | -0.710332 |
| 109 | 1 | 0 | 8.435505  | 4.334244  | -0.821919 |
| 110 | 1 | 0 | 8.966989  | -3.086693 | -0.822428 |
| 111 | 1 | 0 | 7.895072  | -5.295202 | -0.782102 |
| 112 | 1 | 0 | 1.737588  | -9.465713 | -0.569942 |
| 113 | 1 | 0 | -0.710035 | -9.641016 | -0.488999 |
| 114 | 1 | 0 | -7.399002 | -6.390591 | -0.276330 |
| 115 | 1 | 0 | -8.774709 | -4.357385 | -0.235713 |
| 116 | 1 | 0 | -9.306193 | 3.063551  | -0.235203 |
| 117 | 1 | 0 | -8.234276 | 5.272061  | -0.275529 |
| 118 | 1 | 0 | -2.076793 | 9.442572  | -0.487689 |
| 119 | 1 | 0 | 0.370831  | 9.617875  | -0.568632 |
| 120 | 1 | 0 | 7.059798  | 6.367450  | -0.781302 |
| 121 | 6 | 0 | 0.533644  | 0.031648  | 3.522725  |
| 122 | 6 | 0 | 1.264297  | 1.394964  | 3.528235  |
| 123 | 6 | 0 | 1.462647  | -1.205174 | 3.516672  |
| 124 | 9 | 0 | -0.240531 | -0.032484 | 4.631396  |
| 125 | 9 | 0 | -0.251001 | -0.023187 | 2.425502  |
| 126 | 9 | 0 | 0.358903  | 2.379870  | 3.497994  |
| 127 | 9 | 0 | 2.004236  | 1.513842  | 4.640046  |
| 128 | 9 | 0 | 2.063292  | 1.504230  | 2.460816  |

|     |   |   |          |           |          |
|-----|---|---|----------|-----------|----------|
| 129 | 9 | 0 | 0.717480 | -2.315283 | 3.463750 |
| 130 | 9 | 0 | 2.203338 | -1.227435 | 4.634007 |
| 131 | 9 | 0 | 2.277369 | -1.175800 | 2.455783 |

---

***n*-fluoropentane**

---

| Center<br>Number | Atomic<br>Number | Atomic<br>Type | Coordinates (Angstroms) |           |           |
|------------------|------------------|----------------|-------------------------|-----------|-----------|
|                  |                  |                | X                       | Y         | Z         |
| 1                | 6                | 0              | -0.770669               | -1.242914 | 0.000000  |
| 2                | 6                | 0              | -0.770669               | -0.531314 | 1.232527  |
| 3                | 6                | 0              | -0.770669               | 0.891886  | 1.232527  |
| 4                | 6                | 0              | -0.770669               | 1.603486  | 0.000000  |
| 5                | 6                | 0              | -0.770669               | 0.891886  | -1.232527 |
| 6                | 6                | 0              | -0.770669               | -0.531314 | -1.232527 |
| 7                | 6                | 0              | -0.770669               | -2.662214 | 0.000000  |
| 8                | 6                | 0              | -0.770669               | -1.240964 | 2.461677  |
| 9                | 6                | 0              | -0.770669               | 1.601536  | 2.461677  |
| 10               | 6                | 0              | -0.770669               | 3.022786  | 0.000000  |
| 11               | 6                | 0              | -0.770669               | 1.601536  | -2.461677 |
| 12               | 6                | 0              | -0.770669               | -1.240964 | -2.461677 |
| 13               | 6                | 0              | -0.770669               | -3.373106 | -1.233398 |
| 14               | 6                | 0              | -0.770669               | -3.373106 | 1.233398  |
| 15               | 6                | 0              | -0.770669               | -2.664564 | 2.460629  |
| 16               | 6                | 0              | -0.770669               | -0.528256 | 3.694026  |
| 17               | 6                | 0              | -0.770669               | 0.888828  | 3.694026  |
| 18               | 6                | 0              | -0.770669               | 3.025136  | 2.460629  |
| 19               | 6                | 0              | -0.770669               | 3.733678  | 1.233398  |
| 20               | 6                | 0              | -0.770669               | 3.733678  | -1.233398 |
| 21               | 6                | 0              | -0.770669               | 3.025136  | -2.460629 |
| 22               | 6                | 0              | -0.770669               | 0.888828  | -3.694026 |
| 23               | 6                | 0              | -0.770669               | -0.528256 | -3.694026 |
| 24               | 6                | 0              | -0.770669               | -2.664564 | -2.460629 |
| 25               | 6                | 0              | -0.770669               | -4.800506 | -1.232765 |
| 26               | 6                | 0              | -0.770669               | -4.800506 | 1.232765  |
| 27               | 6                | 0              | -0.770669               | -3.377716 | 3.697110  |



|    |   |   |           |           |           |
|----|---|---|-----------|-----------|-----------|
| 28 | 6 | 0 | -0.770669 | -1.242504 | 4.929875  |
| 29 | 6 | 0 | -0.770669 | 1.603076  | 4.929875  |
| 30 | 6 | 0 | -0.770669 | 3.738288  | 3.697110  |
| 31 | 6 | 0 | -0.770669 | 5.161078  | 1.232765  |
| 32 | 6 | 0 | -0.770669 | 5.161078  | -1.232765 |
| 33 | 6 | 0 | -0.770669 | 3.738288  | -3.697110 |
| 34 | 6 | 0 | -0.770669 | 1.603076  | -4.929875 |
| 35 | 6 | 0 | -0.770669 | -1.242504 | -4.929875 |
| 36 | 6 | 0 | -0.770669 | -3.377716 | -3.697110 |
| 37 | 6 | 0 | -0.770669 | -5.510114 | 0.000000  |
| 38 | 6 | 0 | -0.770669 | -2.664914 | 4.928031  |
| 39 | 6 | 0 | -0.770669 | 3.025486  | 4.928031  |
| 40 | 6 | 0 | -0.770669 | 5.870686  | 0.000000  |
| 41 | 6 | 0 | -0.770669 | 3.025486  | -4.928031 |
| 42 | 6 | 0 | -0.770669 | -2.664914 | -4.928031 |
| 43 | 6 | 0 | -0.770669 | -5.507715 | -2.463782 |
| 44 | 6 | 0 | -0.770669 | -5.507715 | 2.463782  |
| 45 | 6 | 0 | -0.770669 | -4.797412 | 3.694062  |
| 46 | 6 | 0 | -0.770669 | -0.530016 | 6.157844  |
| 47 | 6 | 0 | -0.770669 | 0.890588  | 6.157844  |
| 48 | 6 | 0 | -0.770669 | 5.157984  | 3.694062  |
| 49 | 6 | 0 | -0.770669 | 5.868287  | 2.463782  |
| 50 | 6 | 0 | -0.770669 | 5.868287  | -2.463782 |
| 51 | 6 | 0 | -0.770669 | 5.157984  | -3.694062 |
| 52 | 6 | 0 | -0.770669 | 0.890588  | -6.157844 |
| 53 | 6 | 0 | -0.770669 | -0.530016 | -6.157844 |
| 54 | 6 | 0 | -0.770669 | -4.797412 | -3.694062 |
| 55 | 6 | 0 | -0.770669 | -6.942914 | 0.000000  |
| 56 | 6 | 0 | -0.770669 | -3.381314 | 6.168872  |
| 57 | 6 | 0 | -0.770669 | 3.741886  | 6.168872  |
| 58 | 6 | 0 | -0.770669 | 7.303486  | 0.000000  |
| 59 | 6 | 0 | -0.770669 | 3.741886  | -6.168872 |
| 60 | 6 | 0 | -0.770669 | -3.381314 | -6.168872 |
| 61 | 6 | 0 | -0.770669 | -6.945887 | -2.454947 |
| 62 | 6 | 0 | -0.770669 | -6.945887 | 2.454947  |
| 63 | 6 | 0 | -0.770669 | -5.508847 | 4.943974  |
| 64 | 6 | 0 | -0.770669 | -1.256755 | 7.398921  |
| 65 | 6 | 0 | -0.770669 | 1.617327  | 7.398921  |

|     |   |   |           |           |           |
|-----|---|---|-----------|-----------|-----------|
| 66  | 6 | 0 | -0.770669 | 5.869419  | 4.943974  |
| 67  | 6 | 0 | -0.770669 | 7.306459  | 2.454947  |
| 68  | 6 | 0 | -0.770669 | 7.306459  | -2.454947 |
| 69  | 6 | 0 | -0.770669 | 5.869419  | -4.943974 |
| 70  | 6 | 0 | -0.770669 | 1.617327  | -7.398921 |
| 71  | 6 | 0 | -0.770669 | -1.256755 | -7.398921 |
| 72  | 6 | 0 | -0.770669 | -5.508847 | -4.943974 |
| 73  | 6 | 0 | -0.770669 | -7.623732 | -1.241703 |
| 74  | 6 | 0 | -0.770669 | -7.623732 | 1.241703  |
| 75  | 6 | 0 | -0.770669 | -4.797069 | 6.137627  |
| 76  | 6 | 0 | -0.770669 | -2.646377 | 7.379329  |
| 77  | 6 | 0 | -0.770669 | 3.006949  | 7.379329  |
| 78  | 6 | 0 | -0.770669 | 5.157641  | 6.137627  |
| 79  | 6 | 0 | -0.770669 | 7.984304  | 1.241703  |
| 80  | 6 | 0 | -0.770669 | 7.984304  | -1.241703 |
| 81  | 6 | 0 | -0.770669 | 5.157641  | -6.137627 |
| 82  | 6 | 0 | -0.770669 | 3.006949  | -7.379329 |
| 83  | 6 | 0 | -0.770669 | -2.646377 | -7.379329 |
| 84  | 6 | 0 | -0.770669 | -4.797069 | -6.137627 |
| 85  | 6 | 0 | -0.770669 | -7.630835 | -3.725024 |
| 86  | 6 | 0 | -0.770669 | -7.630835 | 3.725024  |
| 87  | 6 | 0 | -0.770669 | -6.951240 | 4.902117  |
| 88  | 6 | 0 | -0.770669 | -0.499309 | 8.627141  |
| 89  | 6 | 0 | -0.770669 | 0.859881  | 8.627141  |
| 90  | 6 | 0 | -0.770669 | 7.311812  | 4.902117  |
| 91  | 6 | 0 | -0.770669 | 7.991407  | 3.725024  |
| 92  | 6 | 0 | -0.770669 | 7.991407  | -3.725024 |
| 93  | 6 | 0 | -0.770669 | 7.311812  | -4.902117 |
| 94  | 6 | 0 | -0.770669 | 0.859881  | -8.627141 |
| 95  | 6 | 0 | -0.770669 | -0.499309 | -8.627141 |
| 96  | 6 | 0 | -0.770669 | -6.951240 | -4.902117 |
| 97  | 1 | 0 | -0.770669 | -8.711732 | -1.240852 |
| 98  | 1 | 0 | -0.770669 | -8.711732 | 1.240852  |
| 99  | 1 | 0 | -0.770669 | -5.340332 | 7.080287  |
| 100 | 1 | 0 | -0.770669 | -3.191114 | 8.321139  |
| 101 | 1 | 0 | -0.770669 | 3.551686  | 8.321139  |
| 102 | 1 | 0 | -0.770669 | 5.700904  | 7.080287  |
| 103 | 1 | 0 | -0.770669 | 9.072304  | 1.240852  |

|     |   |   |           |           |           |
|-----|---|---|-----------|-----------|-----------|
| 104 | 1 | 0 | -0.770669 | 9.072304  | -1.240852 |
| 105 | 1 | 0 | -0.770669 | 5.700904  | -7.080287 |
| 106 | 1 | 0 | -0.770669 | 3.551686  | -8.321139 |
| 107 | 1 | 0 | -0.770669 | -3.191114 | -8.321139 |
| 108 | 1 | 0 | -0.770669 | -5.340332 | -7.080287 |
| 109 | 1 | 0 | -0.770669 | -8.718123 | -3.719972 |
| 110 | 1 | 0 | -0.770669 | -8.718123 | 3.719972  |
| 111 | 1 | 0 | -0.770669 | -7.490509 | 5.846262  |
| 112 | 1 | 0 | -0.770669 | -1.047328 | 9.566234  |
| 113 | 1 | 0 | -0.770669 | 1.407900  | 9.566234  |
| 114 | 1 | 0 | -0.770669 | 7.851081  | 5.846262  |
| 115 | 1 | 0 | -0.770669 | 9.078695  | 3.719972  |
| 116 | 1 | 0 | -0.770669 | 9.078695  | -3.719972 |
| 117 | 1 | 0 | -0.770669 | 7.851081  | -5.846262 |
| 118 | 1 | 0 | -0.770669 | 1.407900  | -9.566234 |
| 119 | 1 | 0 | -0.770669 | -1.047328 | -9.566234 |
| 120 | 1 | 0 | -0.770669 | -7.490509 | -5.846262 |
| 121 | 6 | 0 | 3.348612  | -0.483286 | 0.000000  |
| 122 | 6 | 0 | 3.343223  | -1.324657 | -1.305291 |
| 123 | 6 | 0 | 3.343223  | -1.324657 | 1.305291  |
| 124 | 6 | 0 | 3.351697  | -0.481825 | -2.609672 |
| 125 | 6 | 0 | 3.351697  | -0.481825 | 2.609672  |
| 126 | 9 | 0 | 4.459256  | 0.294257  | 0.000000  |
| 127 | 9 | 0 | 2.252469  | 0.309317  | 0.000000  |
| 128 | 9 | 0 | 4.444104  | -2.112319 | -1.325021 |
| 129 | 9 | 0 | 2.237836  | -2.100357 | -1.323656 |
| 130 | 9 | 0 | 2.237836  | -2.100357 | 1.323656  |
| 131 | 9 | 0 | 4.444104  | -2.112319 | 1.325021  |
| 132 | 9 | 0 | 4.484991  | 0.227107  | -2.696649 |
| 133 | 9 | 0 | 2.308920  | 0.353791  | -2.645558 |
| 134 | 9 | 0 | 3.277768  | -1.314124 | -3.656014 |
| 135 | 9 | 0 | 2.308920  | 0.353791  | 2.645558  |
| 136 | 9 | 0 | 4.484991  | 0.227107  | 2.696649  |
| 137 | 9 | 0 | 3.277768  | -1.314124 | 3.656014  |

---

## *n*-fluoroheptane

---

| Center<br>Number | Atomic<br>Number | Atomic<br>Type | Coordinates (Angstroms) |           |           |
|------------------|------------------|----------------|-------------------------|-----------|-----------|
|                  |                  |                | X                       | Y         | Z         |
| 1                | 6                | 0              | -0.978453               | -1.162488 | 0.000000  |
| 2                | 6                | 0              | -0.978454               | -0.450863 | 1.232560  |
| 3                | 6                | 0              | -0.978425               | 0.972414  | 1.232666  |
| 4                | 6                | 0              | -0.978477               | 1.683955  | 0.000000  |
| 5                | 6                | 0              | -0.978425               | 0.972414  | -1.232666 |
| 6                | 6                | 0              | -0.978454               | -0.450863 | -1.232560 |
| 7                | 6                | 0              | -0.978438               | -2.581750 | 0.000000  |
| 8                | 6                | 0              | -0.978445               | -1.160506 | 2.461674  |
| 9                | 6                | 0              | -0.978424               | 1.681975  | 2.461692  |
| 10               | 6                | 0              | -0.978460               | 3.103250  | 0.000000  |
| 11               | 6                | 0              | -0.978424               | 1.681975  | -2.461692 |
| 12               | 6                | 0              | -0.978445               | -1.160506 | -2.461674 |
| 13               | 6                | 0              | -0.978443               | -3.292642 | -1.233398 |
| 14               | 6                | 0              | -0.978443               | -3.292642 | 1.233398  |
| 15               | 6                | 0              | -0.978439               | -2.584099 | 2.460629  |
| 16               | 6                | 0              | -0.978447               | -0.447792 | 3.694026  |
| 17               | 6                | 0              | -0.978442               | 0.969292  | 3.694026  |
| 18               | 6                | 0              | -0.978441               | 3.105600  | 2.460629  |
| 19               | 6                | 0              | -0.978442               | 3.814142  | 1.233398  |
| 20               | 6                | 0              | -0.978442               | 3.814142  | -1.233398 |
| 21               | 6                | 0              | -0.978441               | 3.105600  | -2.460629 |
| 22               | 6                | 0              | -0.978442               | 0.969292  | -3.694026 |
| 23               | 6                | 0              | -0.978447               | -0.447792 | -3.694026 |
| 24               | 6                | 0              | -0.978439               | -2.584099 | -2.460629 |
| 25               | 6                | 0              | -0.978443               | -4.720041 | -1.232765 |
| 26               | 6                | 0              | -0.978443               | -4.720041 | 1.232765  |
| 27               | 6                | 0              | -0.978443               | -3.297251 | 3.697110  |
| 28               | 6                | 0              | -0.978443               | -1.162040 | 4.929875  |
| 29               | 6                | 0              | -0.978443               | 1.683540  | 4.929875  |
| 30               | 6                | 0              | -0.978443               | 3.818752  | 3.697110  |
| 31               | 6                | 0              | -0.978443               | 5.241542  | 1.232765  |
| 32               | 6                | 0              | -0.978443               | 5.241542  | -1.232765 |
| 33               | 6                | 0              | -0.978443               | 3.818752  | -3.697110 |

---

|    |   |   |           |           |           |
|----|---|---|-----------|-----------|-----------|
| 34 | 6 | 0 | -0.978443 | 1.683540  | -4.929875 |
| 35 | 6 | 0 | -0.978443 | -1.162040 | -4.929875 |
| 36 | 6 | 0 | -0.978443 | -3.297251 | -3.697110 |
| 37 | 6 | 0 | -0.978443 | -5.429650 | 0.000000  |
| 38 | 6 | 0 | -0.978443 | -2.584450 | 4.928031  |
| 39 | 6 | 0 | -0.978443 | 3.105950  | 4.928031  |
| 40 | 6 | 0 | -0.978443 | 5.951150  | 0.000000  |
| 41 | 6 | 0 | -0.978443 | 3.105950  | -4.928031 |
| 42 | 6 | 0 | -0.978443 | -2.584450 | -4.928031 |
| 43 | 6 | 0 | -0.978443 | -5.427250 | -2.463782 |
| 44 | 6 | 0 | -0.978443 | -5.427250 | 2.463782  |
| 45 | 6 | 0 | -0.978443 | -4.716948 | 3.694062  |
| 46 | 6 | 0 | -0.978443 | -0.449552 | 6.157844  |
| 47 | 6 | 0 | -0.978443 | 0.971053  | 6.157844  |
| 48 | 6 | 0 | -0.978443 | 5.238448  | 3.694062  |
| 49 | 6 | 0 | -0.978443 | 5.948751  | 2.463782  |
| 50 | 6 | 0 | -0.978443 | 5.948751  | -2.463782 |
| 51 | 6 | 0 | -0.978443 | 5.238448  | -3.694062 |
| 52 | 6 | 0 | -0.978443 | 0.971053  | -6.157844 |
| 53 | 6 | 0 | -0.978443 | -0.449552 | -6.157844 |
| 54 | 6 | 0 | -0.978443 | -4.716948 | -3.694062 |
| 55 | 6 | 0 | -0.978443 | -6.862450 | 0.000000  |
| 56 | 6 | 0 | -0.978443 | -3.300850 | 6.168872  |
| 57 | 6 | 0 | -0.978443 | 3.822350  | 6.168872  |
| 58 | 6 | 0 | -0.978443 | 7.383950  | 0.000000  |
| 59 | 6 | 0 | -0.978443 | 3.822350  | -6.168872 |
| 60 | 6 | 0 | -0.978443 | -3.300850 | -6.168872 |
| 61 | 6 | 0 | -0.978443 | -6.865423 | -2.454947 |
| 62 | 6 | 0 | -0.978443 | -6.865423 | 2.454947  |
| 63 | 6 | 0 | -0.978443 | -5.428383 | 4.943974  |
| 64 | 6 | 0 | -0.978443 | -1.176290 | 7.398921  |
| 65 | 6 | 0 | -0.978443 | 1.697791  | 7.398921  |
| 66 | 6 | 0 | -0.978443 | 5.949883  | 4.943974  |
| 67 | 6 | 0 | -0.978443 | 7.386924  | 2.454947  |
| 68 | 6 | 0 | -0.978443 | 7.386924  | -2.454947 |
| 69 | 6 | 0 | -0.978443 | 5.949883  | -4.943974 |
| 70 | 6 | 0 | -0.978443 | 1.697791  | -7.398921 |
| 71 | 6 | 0 | -0.978443 | -1.176290 | -7.398921 |

|     |   |   |           |           |           |
|-----|---|---|-----------|-----------|-----------|
| 72  | 6 | 0 | -0.978443 | -5.428383 | -4.943974 |
| 73  | 6 | 0 | -0.978443 | -7.543268 | -1.241703 |
| 74  | 6 | 0 | -0.978443 | -7.543268 | 1.241703  |
| 75  | 6 | 0 | -0.978443 | -4.716605 | 6.137627  |
| 76  | 6 | 0 | -0.978443 | -2.565913 | 7.379329  |
| 77  | 6 | 0 | -0.978443 | 3.087413  | 7.379329  |
| 78  | 6 | 0 | -0.978443 | 5.238105  | 6.137627  |
| 79  | 6 | 0 | -0.978443 | 8.064769  | 1.241703  |
| 80  | 6 | 0 | -0.978443 | 8.064769  | -1.241703 |
| 81  | 6 | 0 | -0.978443 | 5.238105  | -6.137627 |
| 82  | 6 | 0 | -0.978443 | 3.087413  | -7.379329 |
| 83  | 6 | 0 | -0.978443 | -2.565913 | -7.379329 |
| 84  | 6 | 0 | -0.978443 | -4.716605 | -6.137627 |
| 85  | 6 | 0 | -0.978443 | -7.550371 | -3.725024 |
| 86  | 6 | 0 | -0.978443 | -7.550371 | 3.725024  |
| 87  | 6 | 0 | -0.978443 | -6.870775 | 4.902117  |
| 88  | 6 | 0 | -0.978443 | -0.418845 | 8.627141  |
| 89  | 6 | 0 | -0.978443 | 0.940345  | 8.627141  |
| 90  | 6 | 0 | -0.978443 | 7.392276  | 4.902117  |
| 91  | 6 | 0 | -0.978443 | 8.071871  | 3.725024  |
| 92  | 6 | 0 | -0.978443 | 8.071871  | -3.725024 |
| 93  | 6 | 0 | -0.978443 | 7.392276  | -4.902117 |
| 94  | 6 | 0 | -0.978443 | 0.940345  | -8.627141 |
| 95  | 6 | 0 | -0.978443 | -0.418845 | -8.627141 |
| 96  | 6 | 0 | -0.978443 | -6.870775 | -4.902117 |
| 97  | 1 | 0 | -0.978443 | -8.631268 | -1.240852 |
| 98  | 1 | 0 | -0.978443 | -8.631268 | 1.240852  |
| 99  | 1 | 0 | -0.978443 | -5.259868 | 7.080287  |
| 100 | 1 | 0 | -0.978443 | -3.110649 | 8.321139  |
| 101 | 1 | 0 | -0.978443 | 3.632150  | 8.321139  |
| 102 | 1 | 0 | -0.978443 | 5.781369  | 7.080287  |
| 103 | 1 | 0 | -0.978443 | 9.152768  | 1.240852  |
| 104 | 1 | 0 | -0.978443 | 9.152768  | -1.240852 |
| 105 | 1 | 0 | -0.978443 | 5.781369  | -7.080287 |
| 106 | 1 | 0 | -0.978443 | 3.632150  | -8.321139 |
| 107 | 1 | 0 | -0.978443 | -3.110649 | -8.321139 |
| 108 | 1 | 0 | -0.978443 | -5.259868 | -7.080287 |
| 109 | 1 | 0 | -0.978443 | -8.637659 | -3.719972 |

|     |   |   |           |           |           |
|-----|---|---|-----------|-----------|-----------|
| 110 | 1 | 0 | -0.978443 | -8.637659 | 3.719972  |
| 111 | 1 | 0 | -0.978443 | -7.410045 | 5.846262  |
| 112 | 1 | 0 | -0.978443 | -0.966864 | 9.566234  |
| 113 | 1 | 0 | -0.978443 | 1.488364  | 9.566234  |
| 114 | 1 | 0 | -0.978443 | 7.931545  | 5.846262  |
| 115 | 1 | 0 | -0.978443 | 9.159159  | 3.719972  |
| 116 | 1 | 0 | -0.978443 | 9.159159  | -3.719972 |
| 117 | 1 | 0 | -0.978443 | 7.931545  | -5.846262 |
| 118 | 1 | 0 | -0.978443 | 1.488364  | -9.566234 |
| 119 | 1 | 0 | -0.978443 | -0.966864 | -9.566234 |
| 120 | 1 | 0 | -0.978443 | -7.410045 | -5.846262 |
| 121 | 6 | 0 | 3.207542  | -0.332190 | 0.000000  |
| 122 | 6 | 0 | 3.146855  | -1.179511 | -1.307621 |
| 123 | 6 | 0 | 3.146855  | -1.179511 | 1.307621  |
| 124 | 6 | 0 | 3.126575  | -0.329969 | -2.609996 |
| 125 | 6 | 0 | 3.126575  | -0.329969 | 2.609996  |
| 126 | 6 | 0 | 3.160989  | -1.169836 | -3.916731 |
| 127 | 6 | 0 | 3.160989  | -1.169836 | 3.916731  |
| 128 | 9 | 0 | 4.370789  | 0.359085  | 0.000000  |
| 129 | 9 | 0 | 2.169168  | 0.534478  | 0.000000  |
| 130 | 9 | 0 | 4.234934  | -1.986708 | -1.342107 |
| 131 | 9 | 0 | 2.029560  | -1.939033 | -1.290685 |
| 132 | 9 | 0 | 2.029560  | -1.939033 | 1.290685  |
| 133 | 9 | 0 | 4.234934  | -1.986708 | 1.342107  |
| 134 | 9 | 0 | 4.203910  | 0.489505  | -2.626619 |
| 135 | 9 | 0 | 1.999476  | 0.412854  | -2.630537 |
| 136 | 9 | 0 | 1.999476  | 0.412854  | 2.630537  |
| 137 | 9 | 0 | 4.203910  | 0.489505  | 2.626619  |
| 138 | 9 | 0 | 3.014135  | -0.342605 | -4.959293 |
| 139 | 9 | 0 | 2.170493  | -2.068320 | -3.932796 |
| 140 | 9 | 0 | 4.333485  | -1.807211 | -4.029689 |
| 141 | 9 | 0 | 3.014135  | -0.342605 | 4.959293  |
| 142 | 9 | 0 | 4.333485  | -1.807211 | 4.029689  |
| 143 | 9 | 0 | 2.170493  | -2.068320 | 3.932796  |

---

XYZ coordinates of molecules at an initial position for horizontal displacement on  $C_{96}H_{24}$

**propane**

| Center Number | Atomic Number | Atomic Type | Coordinates (Angstroms) |           |          |
|---------------|---------------|-------------|-------------------------|-----------|----------|
|               |               |             | X                       | Y         | Z        |
| 1             | 6             | 0           | 1.423200                | 0.000000  | 1.000000 |
| 2             | 6             | 0           | 0.711600                | 1.232527  | 1.000000 |
| 3             | 6             | 0           | -0.711600               | 1.232527  | 1.000000 |
| 4             | 6             | 0           | -1.423200               | 0.000000  | 1.000000 |
| 5             | 6             | 0           | -0.711600               | -1.232527 | 1.000000 |
| 6             | 6             | 0           | 0.711600                | -1.232527 | 1.000000 |
| 7             | 6             | 0           | 2.842500                | 0.000000  | 1.000000 |
| 8             | 6             | 0           | 1.421250                | 2.461677  | 1.000000 |
| 9             | 6             | 0           | -1.421250               | 2.461677  | 1.000000 |
| 10            | 6             | 0           | -2.842500               | 0.000000  | 1.000000 |
| 11            | 6             | 0           | -1.421250               | -2.461677 | 1.000000 |
| 12            | 6             | 0           | 1.421250                | -2.461677 | 1.000000 |
| 13            | 6             | 0           | 3.553392                | -1.233398 | 1.000000 |
| 14            | 6             | 0           | 3.553392                | 1.233398  | 1.000000 |
| 15            | 6             | 0           | 2.844850                | 2.460629  | 1.000000 |
| 16            | 6             | 0           | 0.708542                | 3.694026  | 1.000000 |
| 17            | 6             | 0           | -0.708542               | 3.694026  | 1.000000 |
| 18            | 6             | 0           | -2.844850               | 2.460629  | 1.000000 |
| 19            | 6             | 0           | -3.553392               | 1.233398  | 1.000000 |
| 20            | 6             | 0           | -3.553392               | -1.233398 | 1.000000 |
| 21            | 6             | 0           | -2.844850               | -2.460629 | 1.000000 |
| 22            | 6             | 0           | -0.708542               | -3.694026 | 1.000000 |
| 23            | 6             | 0           | 0.708542                | -3.694026 | 1.000000 |
| 24            | 6             | 0           | 2.844850                | -2.460629 | 1.000000 |
| 25            | 6             | 0           | 4.980792                | -1.232765 | 1.000000 |
| 26            | 6             | 0           | 4.980792                | 1.232765  | 1.000000 |
| 27            | 6             | 0           | 3.558002                | 3.697110  | 1.000000 |
| 28            | 6             | 0           | 1.422790                | 4.929875  | 1.000000 |
| 29            | 6             | 0           | -1.422790               | 4.929875  | 1.000000 |
| 30            | 6             | 0           | -3.558002               | 3.697110  | 1.000000 |



|    |   |   |           |           |          |
|----|---|---|-----------|-----------|----------|
| 31 | 6 | 0 | -4.980792 | 1.232765  | 1.000000 |
| 32 | 6 | 0 | -4.980792 | -1.232765 | 1.000000 |
| 33 | 6 | 0 | -3.558002 | -3.697110 | 1.000000 |
| 34 | 6 | 0 | -1.422790 | -4.929875 | 1.000000 |
| 35 | 6 | 0 | 1.422790  | -4.929875 | 1.000000 |
| 36 | 6 | 0 | 3.558002  | -3.697110 | 1.000000 |
| 37 | 6 | 0 | 5.690400  | 0.000000  | 1.000000 |
| 38 | 6 | 0 | 2.845200  | 4.928031  | 1.000000 |
| 39 | 6 | 0 | -2.845200 | 4.928031  | 1.000000 |
| 40 | 6 | 0 | -5.690400 | 0.000000  | 1.000000 |
| 41 | 6 | 0 | -2.845200 | -4.928031 | 1.000000 |
| 42 | 6 | 0 | 2.845200  | -4.928031 | 1.000000 |
| 43 | 6 | 0 | 5.688001  | -2.463782 | 1.000000 |
| 44 | 6 | 0 | 5.688001  | 2.463782  | 1.000000 |
| 45 | 6 | 0 | 4.977698  | 3.694062  | 1.000000 |
| 46 | 6 | 0 | 0.710302  | 6.157844  | 1.000000 |
| 47 | 6 | 0 | -0.710302 | 6.157844  | 1.000000 |
| 48 | 6 | 0 | -4.977698 | 3.694062  | 1.000000 |
| 49 | 6 | 0 | -5.688001 | 2.463782  | 1.000000 |
| 50 | 6 | 0 | -5.688001 | -2.463782 | 1.000000 |
| 51 | 6 | 0 | -4.977698 | -3.694062 | 1.000000 |
| 52 | 6 | 0 | -0.710302 | -6.157844 | 1.000000 |
| 53 | 6 | 0 | 0.710302  | -6.157844 | 1.000000 |
| 54 | 6 | 0 | 4.977698  | -3.694062 | 1.000000 |
| 55 | 6 | 0 | 7.123200  | 0.000000  | 1.000000 |
| 56 | 6 | 0 | 3.561600  | 6.168872  | 1.000000 |
| 57 | 6 | 0 | -3.561600 | 6.168872  | 1.000000 |
| 58 | 6 | 0 | -7.123200 | 0.000000  | 1.000000 |
| 59 | 6 | 0 | -3.561600 | -6.168872 | 1.000000 |
| 60 | 6 | 0 | 3.561600  | -6.168872 | 1.000000 |
| 61 | 6 | 0 | 7.126173  | -2.454947 | 1.000000 |
| 62 | 6 | 0 | 7.126173  | 2.454947  | 1.000000 |
| 63 | 6 | 0 | 5.689133  | 4.943974  | 1.000000 |
| 64 | 6 | 0 | 1.437041  | 7.398921  | 1.000000 |
| 65 | 6 | 0 | -1.437041 | 7.398921  | 1.000000 |
| 66 | 6 | 0 | -5.689133 | 4.943974  | 1.000000 |
| 67 | 6 | 0 | -7.126173 | 2.454947  | 1.000000 |
| 68 | 6 | 0 | -7.126173 | -2.454947 | 1.000000 |

|     |   |   |           |           |          |
|-----|---|---|-----------|-----------|----------|
| 69  | 6 | 0 | -5.689133 | -4.943974 | 1.000000 |
| 70  | 6 | 0 | -1.437041 | -7.398921 | 1.000000 |
| 71  | 6 | 0 | 1.437041  | -7.398921 | 1.000000 |
| 72  | 6 | 0 | 5.689133  | -4.943974 | 1.000000 |
| 73  | 6 | 0 | 7.804018  | -1.241703 | 1.000000 |
| 74  | 6 | 0 | 7.804018  | 1.241703  | 1.000000 |
| 75  | 6 | 0 | 4.977355  | 6.137627  | 1.000000 |
| 76  | 6 | 0 | 2.826663  | 7.379329  | 1.000000 |
| 77  | 6 | 0 | -2.826663 | 7.379329  | 1.000000 |
| 78  | 6 | 0 | -4.977355 | 6.137627  | 1.000000 |
| 79  | 6 | 0 | -7.804018 | 1.241703  | 1.000000 |
| 80  | 6 | 0 | -7.804018 | -1.241703 | 1.000000 |
| 81  | 6 | 0 | -4.977355 | -6.137627 | 1.000000 |
| 82  | 6 | 0 | -2.826663 | -7.379329 | 1.000000 |
| 83  | 6 | 0 | 2.826663  | -7.379329 | 1.000000 |
| 84  | 6 | 0 | 4.977355  | -6.137627 | 1.000000 |
| 85  | 6 | 0 | 7.811121  | -3.725024 | 1.000000 |
| 86  | 6 | 0 | 7.811121  | 3.725024  | 1.000000 |
| 87  | 6 | 0 | 7.131526  | 4.902117  | 1.000000 |
| 88  | 6 | 0 | 0.679595  | 8.627141  | 1.000000 |
| 89  | 6 | 0 | -0.679595 | 8.627141  | 1.000000 |
| 90  | 6 | 0 | -7.131526 | 4.902117  | 1.000000 |
| 91  | 6 | 0 | -7.811121 | 3.725024  | 1.000000 |
| 92  | 6 | 0 | -7.811121 | -3.725024 | 1.000000 |
| 93  | 6 | 0 | -7.131526 | -4.902117 | 1.000000 |
| 94  | 6 | 0 | -0.679595 | -8.627141 | 1.000000 |
| 95  | 6 | 0 | 0.679595  | -8.627141 | 1.000000 |
| 96  | 6 | 0 | 7.131526  | -4.902117 | 1.000000 |
| 97  | 1 | 0 | 8.892018  | -1.240852 | 1.000000 |
| 98  | 1 | 0 | 8.892018  | 1.240852  | 1.000000 |
| 99  | 1 | 0 | 5.520618  | 7.080287  | 1.000000 |
| 100 | 1 | 0 | 3.371400  | 8.321139  | 1.000000 |
| 101 | 1 | 0 | -3.371400 | 8.321139  | 1.000000 |
| 102 | 1 | 0 | -5.520618 | 7.080287  | 1.000000 |
| 103 | 1 | 0 | -8.892018 | 1.240852  | 1.000000 |
| 104 | 1 | 0 | -8.892018 | -1.240852 | 1.000000 |
| 105 | 1 | 0 | -5.520618 | -7.080287 | 1.000000 |
| 106 | 1 | 0 | -3.371400 | -8.321139 | 1.000000 |

|     |   |   |           |           |           |
|-----|---|---|-----------|-----------|-----------|
| 107 | 1 | 0 | 3.371400  | -8.321139 | 1.000000  |
| 108 | 1 | 0 | 5.520618  | -7.080287 | 1.000000  |
| 109 | 1 | 0 | 8.898409  | -3.719972 | 1.000000  |
| 110 | 1 | 0 | 8.898409  | 3.719972  | 1.000000  |
| 111 | 1 | 0 | 7.670795  | 5.846262  | 1.000000  |
| 112 | 1 | 0 | 1.227614  | 9.566234  | 1.000000  |
| 113 | 1 | 0 | -1.227614 | 9.566234  | 1.000000  |
| 114 | 1 | 0 | -7.670795 | 5.846262  | 1.000000  |
| 115 | 1 | 0 | -8.898409 | 3.719972  | 1.000000  |
| 116 | 1 | 0 | -8.898409 | -3.719972 | 1.000000  |
| 117 | 1 | 0 | -7.670795 | -5.846262 | 1.000000  |
| 118 | 1 | 0 | -1.227614 | -9.566234 | 1.000000  |
| 119 | 1 | 0 | 1.227614  | -9.566234 | 1.000000  |
| 120 | 1 | 0 | 7.670795  | -5.846262 | 1.000000  |
| 121 | 6 | 0 | 0.645200  | 0.000000  | -2.490000 |
| 122 | 6 | 0 | 1.495030  | -1.275162 | -2.490000 |
| 123 | 6 | 0 | 1.495030  | 1.275162  | -2.490000 |
| 124 | 1 | 0 | -0.014533 | 0.000000  | -3.368325 |
| 125 | 1 | 0 | -0.014533 | 0.000000  | -1.611675 |
| 126 | 1 | 0 | 0.870970  | -2.176386 | -2.490000 |
| 127 | 1 | 0 | 2.142732  | -1.316125 | -3.374800 |
| 128 | 1 | 0 | 2.142732  | -1.316125 | -1.605200 |
| 129 | 1 | 0 | 0.870970  | 2.176386  | -2.490000 |
| 130 | 1 | 0 | 2.143359  | 1.245732  | -3.374800 |
| 131 | 1 | 0 | 2.143359  | 1.245732  | -1.605200 |

-----

***n*-pentane**

-----

| Center<br>Number | Atomic<br>Number | Atomic<br>Type | Coordinates (Angstroms) |           |          |
|------------------|------------------|----------------|-------------------------|-----------|----------|
|                  |                  |                | X                       | Y         | Z        |
| 1                | 6                | 0              | 1.423200                | 0.000000  | 1.000000 |
| 2                | 6                | 0              | 0.711600                | 1.232527  | 1.000000 |
| 3                | 6                | 0              | -0.711600               | 1.232527  | 1.000000 |
| 4                | 6                | 0              | -1.423200               | 0.000000  | 1.000000 |
| 5                | 6                | 0              | -0.711600               | -1.232527 | 1.000000 |

|    |   |   |           |           |          |
|----|---|---|-----------|-----------|----------|
| 6  | 6 | 0 | 0.711600  | -1.232527 | 1.000000 |
| 7  | 6 | 0 | 2.842500  | 0.000000  | 1.000000 |
| 8  | 6 | 0 | 1.421250  | 2.461677  | 1.000000 |
| 9  | 6 | 0 | -1.421250 | 2.461677  | 1.000000 |
| 10 | 6 | 0 | -2.842500 | 0.000000  | 1.000000 |
| 11 | 6 | 0 | -1.421250 | -2.461677 | 1.000000 |
| 12 | 6 | 0 | 1.421250  | -2.461677 | 1.000000 |
| 13 | 6 | 0 | 3.553392  | -1.233398 | 1.000000 |
| 14 | 6 | 0 | 3.553392  | 1.233398  | 1.000000 |
| 15 | 6 | 0 | 2.844850  | 2.460629  | 1.000000 |
| 16 | 6 | 0 | 0.708542  | 3.694026  | 1.000000 |
| 17 | 6 | 0 | -0.708542 | 3.694026  | 1.000000 |
| 18 | 6 | 0 | -2.844850 | 2.460629  | 1.000000 |
| 19 | 6 | 0 | -3.553392 | 1.233398  | 1.000000 |
| 20 | 6 | 0 | -3.553392 | -1.233398 | 1.000000 |
| 21 | 6 | 0 | -2.844850 | -2.460629 | 1.000000 |
| 22 | 6 | 0 | -0.708542 | -3.694026 | 1.000000 |
| 23 | 6 | 0 | 0.708542  | -3.694026 | 1.000000 |
| 24 | 6 | 0 | 2.844850  | -2.460629 | 1.000000 |
| 25 | 6 | 0 | 4.980792  | -1.232765 | 1.000000 |
| 26 | 6 | 0 | 4.980792  | 1.232765  | 1.000000 |
| 27 | 6 | 0 | 3.558002  | 3.697110  | 1.000000 |
| 28 | 6 | 0 | 1.422790  | 4.929875  | 1.000000 |
| 29 | 6 | 0 | -1.422790 | 4.929875  | 1.000000 |
| 30 | 6 | 0 | -3.558002 | 3.697110  | 1.000000 |
| 31 | 6 | 0 | -4.980792 | 1.232765  | 1.000000 |
| 32 | 6 | 0 | -4.980792 | -1.232765 | 1.000000 |
| 33 | 6 | 0 | -3.558002 | -3.697110 | 1.000000 |
| 34 | 6 | 0 | -1.422790 | -4.929875 | 1.000000 |
| 35 | 6 | 0 | 1.422790  | -4.929875 | 1.000000 |
| 36 | 6 | 0 | 3.558002  | -3.697110 | 1.000000 |
| 37 | 6 | 0 | 5.690400  | 0.000000  | 1.000000 |
| 38 | 6 | 0 | 2.845200  | 4.928031  | 1.000000 |
| 39 | 6 | 0 | -2.845200 | 4.928031  | 1.000000 |
| 40 | 6 | 0 | -5.690400 | 0.000000  | 1.000000 |
| 41 | 6 | 0 | -2.845200 | -4.928031 | 1.000000 |
| 42 | 6 | 0 | 2.845200  | -4.928031 | 1.000000 |
| 43 | 6 | 0 | 5.688001  | -2.463782 | 1.000000 |

|    |   |   |           |           |          |
|----|---|---|-----------|-----------|----------|
| 44 | 6 | 0 | 5.688001  | 2.463782  | 1.000000 |
| 45 | 6 | 0 | 4.977698  | 3.694062  | 1.000000 |
| 46 | 6 | 0 | 0.710302  | 6.157844  | 1.000000 |
| 47 | 6 | 0 | -0.710302 | 6.157844  | 1.000000 |
| 48 | 6 | 0 | -4.977698 | 3.694062  | 1.000000 |
| 49 | 6 | 0 | -5.688001 | 2.463782  | 1.000000 |
| 50 | 6 | 0 | -5.688001 | -2.463782 | 1.000000 |
| 51 | 6 | 0 | -4.977698 | -3.694062 | 1.000000 |
| 52 | 6 | 0 | -0.710302 | -6.157844 | 1.000000 |
| 53 | 6 | 0 | 0.710302  | -6.157844 | 1.000000 |
| 54 | 6 | 0 | 4.977698  | -3.694062 | 1.000000 |
| 55 | 6 | 0 | 7.123200  | 0.000000  | 1.000000 |
| 56 | 6 | 0 | 3.561600  | 6.168872  | 1.000000 |
| 57 | 6 | 0 | -3.561600 | 6.168872  | 1.000000 |
| 58 | 6 | 0 | -7.123200 | 0.000000  | 1.000000 |
| 59 | 6 | 0 | -3.561600 | -6.168872 | 1.000000 |
| 60 | 6 | 0 | 3.561600  | -6.168872 | 1.000000 |
| 61 | 6 | 0 | 7.126173  | -2.454947 | 1.000000 |
| 62 | 6 | 0 | 7.126173  | 2.454947  | 1.000000 |
| 63 | 6 | 0 | 5.689133  | 4.943974  | 1.000000 |
| 64 | 6 | 0 | 1.437041  | 7.398921  | 1.000000 |
| 65 | 6 | 0 | -1.437041 | 7.398921  | 1.000000 |
| 66 | 6 | 0 | -5.689133 | 4.943974  | 1.000000 |
| 67 | 6 | 0 | -7.126173 | 2.454947  | 1.000000 |
| 68 | 6 | 0 | -7.126173 | -2.454947 | 1.000000 |
| 69 | 6 | 0 | -5.689133 | -4.943974 | 1.000000 |
| 70 | 6 | 0 | -1.437041 | -7.398921 | 1.000000 |
| 71 | 6 | 0 | 1.437041  | -7.398921 | 1.000000 |
| 72 | 6 | 0 | 5.689133  | -4.943974 | 1.000000 |
| 73 | 6 | 0 | 7.804018  | -1.241703 | 1.000000 |
| 74 | 6 | 0 | 7.804018  | 1.241703  | 1.000000 |
| 75 | 6 | 0 | 4.977355  | 6.137627  | 1.000000 |
| 76 | 6 | 0 | 2.826663  | 7.379329  | 1.000000 |
| 77 | 6 | 0 | -2.826663 | 7.379329  | 1.000000 |
| 78 | 6 | 0 | -4.977355 | 6.137627  | 1.000000 |
| 79 | 6 | 0 | -7.804018 | 1.241703  | 1.000000 |
| 80 | 6 | 0 | -7.804018 | -1.241703 | 1.000000 |
| 81 | 6 | 0 | -4.977355 | -6.137627 | 1.000000 |

|     |   |   |           |           |          |
|-----|---|---|-----------|-----------|----------|
| 82  | 6 | 0 | -2.826663 | -7.379329 | 1.000000 |
| 83  | 6 | 0 | 2.826663  | -7.379329 | 1.000000 |
| 84  | 6 | 0 | 4.977355  | -6.137627 | 1.000000 |
| 85  | 6 | 0 | 7.811121  | -3.725024 | 1.000000 |
| 86  | 6 | 0 | 7.811121  | 3.725024  | 1.000000 |
| 87  | 6 | 0 | 7.131526  | 4.902117  | 1.000000 |
| 88  | 6 | 0 | 0.679595  | 8.627141  | 1.000000 |
| 89  | 6 | 0 | -0.679595 | 8.627141  | 1.000000 |
| 90  | 6 | 0 | -7.131526 | 4.902117  | 1.000000 |
| 91  | 6 | 0 | -7.811121 | 3.725024  | 1.000000 |
| 92  | 6 | 0 | -7.811121 | -3.725024 | 1.000000 |
| 93  | 6 | 0 | -7.131526 | -4.902117 | 1.000000 |
| 94  | 6 | 0 | -0.679595 | -8.627141 | 1.000000 |
| 95  | 6 | 0 | 0.679595  | -8.627141 | 1.000000 |
| 96  | 6 | 0 | 7.131526  | -4.902117 | 1.000000 |
| 97  | 1 | 0 | 8.892018  | -1.240852 | 1.000000 |
| 98  | 1 | 0 | 8.892018  | 1.240852  | 1.000000 |
| 99  | 1 | 0 | 5.520618  | 7.080287  | 1.000000 |
| 100 | 1 | 0 | 3.371400  | 8.321139  | 1.000000 |
| 101 | 1 | 0 | -3.371400 | 8.321139  | 1.000000 |
| 102 | 1 | 0 | -5.520618 | 7.080287  | 1.000000 |
| 103 | 1 | 0 | -8.892018 | 1.240852  | 1.000000 |
| 104 | 1 | 0 | -8.892018 | -1.240852 | 1.000000 |
| 105 | 1 | 0 | -5.520618 | -7.080287 | 1.000000 |
| 106 | 1 | 0 | -3.371400 | -8.321139 | 1.000000 |
| 107 | 1 | 0 | 3.371400  | -8.321139 | 1.000000 |
| 108 | 1 | 0 | 5.520618  | -7.080287 | 1.000000 |
| 109 | 1 | 0 | 8.898409  | -3.719972 | 1.000000 |
| 110 | 1 | 0 | 8.898409  | 3.719972  | 1.000000 |
| 111 | 1 | 0 | 7.670795  | 5.846262  | 1.000000 |
| 112 | 1 | 0 | 1.227614  | 9.566234  | 1.000000 |
| 113 | 1 | 0 | -1.227614 | 9.566234  | 1.000000 |
| 114 | 1 | 0 | -7.670795 | 5.846262  | 1.000000 |
| 115 | 1 | 0 | -8.898409 | 3.719972  | 1.000000 |
| 116 | 1 | 0 | -8.898409 | -3.719972 | 1.000000 |
| 117 | 1 | 0 | -7.670795 | -5.846262 | 1.000000 |
| 118 | 1 | 0 | -1.227614 | -9.566234 | 1.000000 |
| 119 | 1 | 0 | 1.227614  | -9.566234 | 1.000000 |

|     |   |   |           |           |           |
|-----|---|---|-----------|-----------|-----------|
| 120 | 1 | 0 | 7.670795  | -5.846262 | 1.000000  |
| 121 | 6 | 0 | 0.645200  | 0.000000  | -2.500000 |
| 122 | 6 | 0 | 1.485876  | -1.282292 | -2.500000 |
| 123 | 6 | 0 | 1.485876  | 1.282292  | -2.500000 |
| 124 | 6 | 0 | 0.635098  | -2.556341 | -2.500000 |
| 125 | 6 | 0 | 0.635098  | 2.556341  | -2.500000 |
| 126 | 1 | 0 | -0.017486 | 0.000000  | -3.378731 |
| 127 | 1 | 0 | -0.017486 | 0.000000  | -1.621269 |
| 128 | 1 | 0 | 2.146947  | -1.280706 | -3.378443 |
| 129 | 1 | 0 | 2.146947  | -1.280706 | -1.621557 |
| 130 | 1 | 0 | 2.146947  | 1.280706  | -1.621557 |
| 131 | 1 | 0 | 2.146947  | 1.280706  | -3.378443 |
| 132 | 1 | 0 | -0.012496 | -2.597529 | -3.384745 |
| 133 | 1 | 0 | -0.012496 | -2.597529 | -1.615255 |
| 134 | 1 | 0 | 1.258772  | -3.457710 | -2.500000 |
| 135 | 1 | 0 | -0.012496 | 2.597529  | -1.615255 |
| 136 | 1 | 0 | -0.012496 | 2.597529  | -3.384745 |
| 137 | 1 | 0 | 1.258772  | 3.457710  | -2.500000 |

---

### *n*-heptane

---

| Center<br>Number | Atomic<br>Number | Atomic<br>Type | Coordinates (Angstroms) |           |          |
|------------------|------------------|----------------|-------------------------|-----------|----------|
|                  |                  |                | X                       | Y         | Z        |
| 1                | 6                | 0              | 1.423200                | 0.000000  | 1.000000 |
| 2                | 6                | 0              | 0.711600                | 1.232527  | 1.000000 |
| 3                | 6                | 0              | -0.711600               | 1.232527  | 1.000000 |
| 4                | 6                | 0              | -1.423200               | 0.000000  | 1.000000 |
| 5                | 6                | 0              | -0.711600               | -1.232527 | 1.000000 |
| 6                | 6                | 0              | 0.711600                | -1.232527 | 1.000000 |
| 7                | 6                | 0              | 2.842500                | 0.000000  | 1.000000 |
| 8                | 6                | 0              | 1.421250                | 2.461677  | 1.000000 |
| 9                | 6                | 0              | -1.421250               | 2.461677  | 1.000000 |
| 10               | 6                | 0              | -2.842500               | 0.000000  | 1.000000 |
| 11               | 6                | 0              | -1.421250               | -2.461677 | 1.000000 |
| 12               | 6                | 0              | 1.421250                | -2.461677 | 1.000000 |

|    |   |   |           |           |          |
|----|---|---|-----------|-----------|----------|
| 13 | 6 | 0 | 3.553392  | -1.233398 | 1.000000 |
| 14 | 6 | 0 | 3.553392  | 1.233398  | 1.000000 |
| 15 | 6 | 0 | 2.844850  | 2.460629  | 1.000000 |
| 16 | 6 | 0 | 0.708542  | 3.694026  | 1.000000 |
| 17 | 6 | 0 | -0.708542 | 3.694026  | 1.000000 |
| 18 | 6 | 0 | -2.844850 | 2.460629  | 1.000000 |
| 19 | 6 | 0 | -3.553392 | 1.233398  | 1.000000 |
| 20 | 6 | 0 | -3.553392 | -1.233398 | 1.000000 |
| 21 | 6 | 0 | -2.844850 | -2.460629 | 1.000000 |
| 22 | 6 | 0 | -0.708542 | -3.694026 | 1.000000 |
| 23 | 6 | 0 | 0.708542  | -3.694026 | 1.000000 |
| 24 | 6 | 0 | 2.844850  | -2.460629 | 1.000000 |
| 25 | 6 | 0 | 4.980792  | -1.232765 | 1.000000 |
| 26 | 6 | 0 | 4.980792  | 1.232765  | 1.000000 |
| 27 | 6 | 0 | 3.558002  | 3.697110  | 1.000000 |
| 28 | 6 | 0 | 1.422790  | 4.929875  | 1.000000 |
| 29 | 6 | 0 | -1.422790 | 4.929875  | 1.000000 |
| 30 | 6 | 0 | -3.558002 | 3.697110  | 1.000000 |
| 31 | 6 | 0 | -4.980792 | 1.232765  | 1.000000 |
| 32 | 6 | 0 | -4.980792 | -1.232765 | 1.000000 |
| 33 | 6 | 0 | -3.558002 | -3.697110 | 1.000000 |
| 34 | 6 | 0 | -1.422790 | -4.929875 | 1.000000 |
| 35 | 6 | 0 | 1.422790  | -4.929875 | 1.000000 |
| 36 | 6 | 0 | 3.558002  | -3.697110 | 1.000000 |
| 37 | 6 | 0 | 5.690400  | 0.000000  | 1.000000 |
| 38 | 6 | 0 | 2.845200  | 4.928031  | 1.000000 |
| 39 | 6 | 0 | -2.845200 | 4.928031  | 1.000000 |
| 40 | 6 | 0 | -5.690400 | 0.000000  | 1.000000 |
| 41 | 6 | 0 | -2.845200 | -4.928031 | 1.000000 |
| 42 | 6 | 0 | 2.845200  | -4.928031 | 1.000000 |
| 43 | 6 | 0 | 5.688001  | -2.463782 | 1.000000 |
| 44 | 6 | 0 | 5.688001  | 2.463782  | 1.000000 |
| 45 | 6 | 0 | 4.977698  | 3.694062  | 1.000000 |
| 46 | 6 | 0 | 0.710302  | 6.157844  | 1.000000 |
| 47 | 6 | 0 | -0.710302 | 6.157844  | 1.000000 |
| 48 | 6 | 0 | -4.977698 | 3.694062  | 1.000000 |
| 49 | 6 | 0 | -5.688001 | 2.463782  | 1.000000 |
| 50 | 6 | 0 | -5.688001 | -2.463782 | 1.000000 |



|    |   |   |           |           |          |
|----|---|---|-----------|-----------|----------|
| 51 | 6 | 0 | -4.977698 | -3.694062 | 1.000000 |
| 52 | 6 | 0 | -0.710302 | -6.157844 | 1.000000 |
| 53 | 6 | 0 | 0.710302  | -6.157844 | 1.000000 |
| 54 | 6 | 0 | 4.977698  | -3.694062 | 1.000000 |
| 55 | 6 | 0 | 7.123200  | 0.000000  | 1.000000 |
| 56 | 6 | 0 | 3.561600  | 6.168872  | 1.000000 |
| 57 | 6 | 0 | -3.561600 | 6.168872  | 1.000000 |
| 58 | 6 | 0 | -7.123200 | 0.000000  | 1.000000 |
| 59 | 6 | 0 | -3.561600 | -6.168872 | 1.000000 |
| 60 | 6 | 0 | 3.561600  | -6.168872 | 1.000000 |
| 61 | 6 | 0 | 7.126173  | -2.454947 | 1.000000 |
| 62 | 6 | 0 | 7.126173  | 2.454947  | 1.000000 |
| 63 | 6 | 0 | 5.689133  | 4.943974  | 1.000000 |
| 64 | 6 | 0 | 1.437041  | 7.398921  | 1.000000 |
| 65 | 6 | 0 | -1.437041 | 7.398921  | 1.000000 |
| 66 | 6 | 0 | -5.689133 | 4.943974  | 1.000000 |
| 67 | 6 | 0 | -7.126173 | 2.454947  | 1.000000 |
| 68 | 6 | 0 | -7.126173 | -2.454947 | 1.000000 |
| 69 | 6 | 0 | -5.689133 | -4.943974 | 1.000000 |
| 70 | 6 | 0 | -1.437041 | -7.398921 | 1.000000 |
| 71 | 6 | 0 | 1.437041  | -7.398921 | 1.000000 |
| 72 | 6 | 0 | 5.689133  | -4.943974 | 1.000000 |
| 73 | 6 | 0 | 7.804018  | -1.241703 | 1.000000 |
| 74 | 6 | 0 | 7.804018  | 1.241703  | 1.000000 |
| 75 | 6 | 0 | 4.977355  | 6.137627  | 1.000000 |
| 76 | 6 | 0 | 2.826663  | 7.379329  | 1.000000 |
| 77 | 6 | 0 | -2.826663 | 7.379329  | 1.000000 |
| 78 | 6 | 0 | -4.977355 | 6.137627  | 1.000000 |
| 79 | 6 | 0 | -7.804018 | 1.241703  | 1.000000 |
| 80 | 6 | 0 | -7.804018 | -1.241703 | 1.000000 |
| 81 | 6 | 0 | -4.977355 | -6.137627 | 1.000000 |
| 82 | 6 | 0 | -2.826663 | -7.379329 | 1.000000 |
| 83 | 6 | 0 | 2.826663  | -7.379329 | 1.000000 |
| 84 | 6 | 0 | 4.977355  | -6.137627 | 1.000000 |
| 85 | 6 | 0 | 7.811121  | -3.725024 | 1.000000 |
| 86 | 6 | 0 | 7.811121  | 3.725024  | 1.000000 |
| 87 | 6 | 0 | 7.131526  | 4.902117  | 1.000000 |
| 88 | 6 | 0 | 0.679595  | 8.627141  | 1.000000 |

|     |   |   |           |           |           |
|-----|---|---|-----------|-----------|-----------|
| 89  | 6 | 0 | -0.679595 | 8.627141  | 1.000000  |
| 90  | 6 | 0 | -7.131526 | 4.902117  | 1.000000  |
| 91  | 6 | 0 | -7.811121 | 3.725024  | 1.000000  |
| 92  | 6 | 0 | -7.811121 | -3.725024 | 1.000000  |
| 93  | 6 | 0 | -7.131526 | -4.902117 | 1.000000  |
| 94  | 6 | 0 | -0.679595 | -8.627141 | 1.000000  |
| 95  | 6 | 0 | 0.679595  | -8.627141 | 1.000000  |
| 96  | 6 | 0 | 7.131526  | -4.902117 | 1.000000  |
| 97  | 1 | 0 | 8.892018  | -1.240852 | 1.000000  |
| 98  | 1 | 0 | 8.892018  | 1.240852  | 1.000000  |
| 99  | 1 | 0 | 5.520618  | 7.080287  | 1.000000  |
| 100 | 1 | 0 | 3.371400  | 8.321139  | 1.000000  |
| 101 | 1 | 0 | -3.371400 | 8.321139  | 1.000000  |
| 102 | 1 | 0 | -5.520618 | 7.080287  | 1.000000  |
| 103 | 1 | 0 | -8.892018 | 1.240852  | 1.000000  |
| 104 | 1 | 0 | -8.892018 | -1.240852 | 1.000000  |
| 105 | 1 | 0 | -5.520618 | -7.080287 | 1.000000  |
| 106 | 1 | 0 | -3.371400 | -8.321139 | 1.000000  |
| 107 | 1 | 0 | 3.371400  | -8.321139 | 1.000000  |
| 108 | 1 | 0 | 5.520618  | -7.080287 | 1.000000  |
| 109 | 1 | 0 | 8.898409  | -3.719972 | 1.000000  |
| 110 | 1 | 0 | 8.898409  | 3.719972  | 1.000000  |
| 111 | 1 | 0 | 7.670795  | 5.846262  | 1.000000  |
| 112 | 1 | 0 | 1.227614  | 9.566234  | 1.000000  |
| 113 | 1 | 0 | -1.227614 | 9.566234  | 1.000000  |
| 114 | 1 | 0 | -7.670795 | 5.846262  | 1.000000  |
| 115 | 1 | 0 | -8.898409 | 3.719972  | 1.000000  |
| 116 | 1 | 0 | -8.898409 | -3.719972 | 1.000000  |
| 117 | 1 | 0 | -7.670795 | -5.846262 | 1.000000  |
| 118 | 1 | 0 | -1.227614 | -9.566234 | 1.000000  |
| 119 | 1 | 0 | 1.227614  | -9.566234 | 1.000000  |
| 120 | 1 | 0 | 7.670795  | -5.846262 | 1.000000  |
| 121 | 6 | 0 | 0.645200  | 0.000000  | -2.510000 |
| 122 | 6 | 0 | 1.486600  | -1.281577 | -2.510000 |
| 123 | 6 | 0 | 1.486600  | 1.281577  | -2.510000 |
| 124 | 6 | 0 | 0.645953  | -2.564008 | -2.510000 |
| 125 | 6 | 0 | 0.645953  | 2.564008  | -2.510000 |
| 126 | 6 | 0 | 1.496448  | -3.838125 | -2.510000 |

|     |   |   |           |           |           |
|-----|---|---|-----------|-----------|-----------|
| 127 | 6 | 0 | 1.496448  | 3.838125  | -2.510000 |
| 128 | 1 | 0 | -0.017003 | 0.000000  | -3.388719 |
| 129 | 1 | 0 | -0.017003 | 0.000000  | -1.631281 |
| 130 | 1 | 0 | 2.148917  | -1.282124 | -3.388758 |
| 131 | 1 | 0 | 2.148917  | -1.282124 | -1.631242 |
| 132 | 1 | 0 | 2.148917  | 1.282124  | -1.631242 |
| 133 | 1 | 0 | 2.148917  | 1.282124  | -3.388758 |
| 134 | 1 | 0 | -0.015258 | -2.562278 | -3.388338 |
| 135 | 1 | 0 | -0.015258 | -2.562278 | -1.631662 |
| 136 | 1 | 0 | -0.015258 | 2.562278  | -1.631662 |
| 137 | 1 | 0 | -0.015258 | 2.562278  | -3.388338 |
| 138 | 1 | 0 | 0.872326  | -4.739183 | -2.510000 |
| 139 | 1 | 0 | 2.144048  | -3.879749 | -1.625280 |
| 140 | 1 | 0 | 2.144048  | -3.879749 | -3.394720 |
| 141 | 1 | 0 | 0.872326  | 4.739183  | -2.510000 |
| 142 | 1 | 0 | 2.144048  | 3.879749  | -3.394720 |
| 143 | 1 | 0 | 2.144048  | 3.879749  | -1.625280 |

---

### fluoropropane

---

| Center<br>Number | Atomic<br>Number | Atomic<br>Type | Coordinates (Angstroms) |           |          |
|------------------|------------------|----------------|-------------------------|-----------|----------|
|                  |                  |                | X                       | Y         | Z        |
| 1                | 6                | 0              | 1.423200                | 0.000000  | 1.000000 |
| 2                | 6                | 0              | 0.711600                | 1.232527  | 1.000000 |
| 3                | 6                | 0              | -0.711600               | 1.232527  | 1.000000 |
| 4                | 6                | 0              | -1.423200               | 0.000000  | 1.000000 |
| 5                | 6                | 0              | -0.711600               | -1.232527 | 1.000000 |
| 6                | 6                | 0              | 0.711600                | -1.232527 | 1.000000 |
| 7                | 6                | 0              | 2.842500                | 0.000000  | 1.000000 |
| 8                | 6                | 0              | 1.421250                | 2.461677  | 1.000000 |
| 9                | 6                | 0              | -1.421250               | 2.461677  | 1.000000 |
| 10               | 6                | 0              | -2.842500               | 0.000000  | 1.000000 |
| 11               | 6                | 0              | -1.421250               | -2.461677 | 1.000000 |
| 12               | 6                | 0              | 1.421250                | -2.461677 | 1.000000 |
| 13               | 6                | 0              | 3.553392                | -1.233398 | 1.000000 |

|    |   |   |           |           |          |
|----|---|---|-----------|-----------|----------|
| 14 | 6 | 0 | 3.553392  | 1.233398  | 1.000000 |
| 15 | 6 | 0 | 2.844850  | 2.460629  | 1.000000 |
| 16 | 6 | 0 | 0.708542  | 3.694026  | 1.000000 |
| 17 | 6 | 0 | -0.708542 | 3.694026  | 1.000000 |
| 18 | 6 | 0 | -2.844850 | 2.460629  | 1.000000 |
| 19 | 6 | 0 | -3.553392 | 1.233398  | 1.000000 |
| 20 | 6 | 0 | -3.553392 | -1.233398 | 1.000000 |
| 21 | 6 | 0 | -2.844850 | -2.460629 | 1.000000 |
| 22 | 6 | 0 | -0.708542 | -3.694026 | 1.000000 |
| 23 | 6 | 0 | 0.708542  | -3.694026 | 1.000000 |
| 24 | 6 | 0 | 2.844850  | -2.460629 | 1.000000 |
| 25 | 6 | 0 | 4.980792  | -1.232765 | 1.000000 |
| 26 | 6 | 0 | 4.980792  | 1.232765  | 1.000000 |
| 27 | 6 | 0 | 3.558002  | 3.697110  | 1.000000 |
| 28 | 6 | 0 | 1.422790  | 4.929875  | 1.000000 |
| 29 | 6 | 0 | -1.422790 | 4.929875  | 1.000000 |
| 30 | 6 | 0 | -3.558002 | 3.697110  | 1.000000 |
| 31 | 6 | 0 | -4.980792 | 1.232765  | 1.000000 |
| 32 | 6 | 0 | -4.980792 | -1.232765 | 1.000000 |
| 33 | 6 | 0 | -3.558002 | -3.697110 | 1.000000 |
| 34 | 6 | 0 | -1.422790 | -4.929875 | 1.000000 |
| 35 | 6 | 0 | 1.422790  | -4.929875 | 1.000000 |
| 36 | 6 | 0 | 3.558002  | -3.697110 | 1.000000 |
| 37 | 6 | 0 | 5.690400  | 0.000000  | 1.000000 |
| 38 | 6 | 0 | 2.845200  | 4.928031  | 1.000000 |
| 39 | 6 | 0 | -2.845200 | 4.928031  | 1.000000 |
| 40 | 6 | 0 | -5.690400 | 0.000000  | 1.000000 |
| 41 | 6 | 0 | -2.845200 | -4.928031 | 1.000000 |
| 42 | 6 | 0 | 2.845200  | -4.928031 | 1.000000 |
| 43 | 6 | 0 | 5.688001  | -2.463782 | 1.000000 |
| 44 | 6 | 0 | 5.688001  | 2.463782  | 1.000000 |
| 45 | 6 | 0 | 4.977698  | 3.694062  | 1.000000 |
| 46 | 6 | 0 | 0.710302  | 6.157844  | 1.000000 |
| 47 | 6 | 0 | -0.710302 | 6.157844  | 1.000000 |
| 48 | 6 | 0 | -4.977698 | 3.694062  | 1.000000 |
| 49 | 6 | 0 | -5.688001 | 2.463782  | 1.000000 |
| 50 | 6 | 0 | -5.688001 | -2.463782 | 1.000000 |
| 51 | 6 | 0 | -4.977698 | -3.694062 | 1.000000 |

|    |   |   |           |           |          |
|----|---|---|-----------|-----------|----------|
| 52 | 6 | 0 | -0.710302 | -6.157844 | 1.000000 |
| 53 | 6 | 0 | 0.710302  | -6.157844 | 1.000000 |
| 54 | 6 | 0 | 4.977698  | -3.694062 | 1.000000 |
| 55 | 6 | 0 | 7.123200  | 0.000000  | 1.000000 |
| 56 | 6 | 0 | 3.561600  | 6.168872  | 1.000000 |
| 57 | 6 | 0 | -3.561600 | 6.168872  | 1.000000 |
| 58 | 6 | 0 | -7.123200 | 0.000000  | 1.000000 |
| 59 | 6 | 0 | -3.561600 | -6.168872 | 1.000000 |
| 60 | 6 | 0 | 3.561600  | -6.168872 | 1.000000 |
| 61 | 6 | 0 | 7.126173  | -2.454947 | 1.000000 |
| 62 | 6 | 0 | 7.126173  | 2.454947  | 1.000000 |
| 63 | 6 | 0 | 5.689133  | 4.943974  | 1.000000 |
| 64 | 6 | 0 | 1.437041  | 7.398921  | 1.000000 |
| 65 | 6 | 0 | -1.437041 | 7.398921  | 1.000000 |
| 66 | 6 | 0 | -5.689133 | 4.943974  | 1.000000 |
| 67 | 6 | 0 | -7.126173 | 2.454947  | 1.000000 |
| 68 | 6 | 0 | -7.126173 | -2.454947 | 1.000000 |
| 69 | 6 | 0 | -5.689133 | -4.943974 | 1.000000 |
| 70 | 6 | 0 | -1.437041 | -7.398921 | 1.000000 |
| 71 | 6 | 0 | 1.437041  | -7.398921 | 1.000000 |
| 72 | 6 | 0 | 5.689133  | -4.943974 | 1.000000 |
| 73 | 6 | 0 | 7.804018  | -1.241703 | 1.000000 |
| 74 | 6 | 0 | 7.804018  | 1.241703  | 1.000000 |
| 75 | 6 | 0 | 4.977355  | 6.137627  | 1.000000 |
| 76 | 6 | 0 | 2.826663  | 7.379329  | 1.000000 |
| 77 | 6 | 0 | -2.826663 | 7.379329  | 1.000000 |
| 78 | 6 | 0 | -4.977355 | 6.137627  | 1.000000 |
| 79 | 6 | 0 | -7.804018 | 1.241703  | 1.000000 |
| 80 | 6 | 0 | -7.804018 | -1.241703 | 1.000000 |
| 81 | 6 | 0 | -4.977355 | -6.137627 | 1.000000 |
| 82 | 6 | 0 | -2.826663 | -7.379329 | 1.000000 |
| 83 | 6 | 0 | 2.826663  | -7.379329 | 1.000000 |
| 84 | 6 | 0 | 4.977355  | -6.137627 | 1.000000 |
| 85 | 6 | 0 | 7.811121  | -3.725024 | 1.000000 |
| 86 | 6 | 0 | 7.811121  | 3.725024  | 1.000000 |
| 87 | 6 | 0 | 7.131526  | 4.902117  | 1.000000 |
| 88 | 6 | 0 | 0.679595  | 8.627141  | 1.000000 |
| 89 | 6 | 0 | -0.679595 | 8.627141  | 1.000000 |

|     |   |   |           |           |           |
|-----|---|---|-----------|-----------|-----------|
| 90  | 6 | 0 | -7.131526 | 4.902117  | 1.000000  |
| 91  | 6 | 0 | -7.811121 | 3.725024  | 1.000000  |
| 92  | 6 | 0 | -7.811121 | -3.725024 | 1.000000  |
| 93  | 6 | 0 | -7.131526 | -4.902117 | 1.000000  |
| 94  | 6 | 0 | -0.679595 | -8.627141 | 1.000000  |
| 95  | 6 | 0 | 0.679595  | -8.627141 | 1.000000  |
| 96  | 6 | 0 | 7.131526  | -4.902117 | 1.000000  |
| 97  | 1 | 0 | 8.892018  | -1.240852 | 1.000000  |
| 98  | 1 | 0 | 8.892018  | 1.240852  | 1.000000  |
| 99  | 1 | 0 | 5.520618  | 7.080287  | 1.000000  |
| 100 | 1 | 0 | 3.371400  | 8.321139  | 1.000000  |
| 101 | 1 | 0 | -3.371400 | 8.321139  | 1.000000  |
| 102 | 1 | 0 | -5.520618 | 7.080287  | 1.000000  |
| 103 | 1 | 0 | -8.892018 | 1.240852  | 1.000000  |
| 104 | 1 | 0 | -8.892018 | -1.240852 | 1.000000  |
| 105 | 1 | 0 | -5.520618 | -7.080287 | 1.000000  |
| 106 | 1 | 0 | -3.371400 | -8.321139 | 1.000000  |
| 107 | 1 | 0 | 3.371400  | -8.321139 | 1.000000  |
| 108 | 1 | 0 | 5.520618  | -7.080287 | 1.000000  |
| 109 | 1 | 0 | 8.898409  | -3.719972 | 1.000000  |
| 110 | 1 | 0 | 8.898409  | 3.719972  | 1.000000  |
| 111 | 1 | 0 | 7.670795  | 5.846262  | 1.000000  |
| 112 | 1 | 0 | 1.227614  | 9.566234  | 1.000000  |
| 113 | 1 | 0 | -1.227614 | 9.566234  | 1.000000  |
| 114 | 1 | 0 | -7.670795 | 5.846262  | 1.000000  |
| 115 | 1 | 0 | -8.898409 | 3.719972  | 1.000000  |
| 116 | 1 | 0 | -8.898409 | -3.719972 | 1.000000  |
| 117 | 1 | 0 | -7.670795 | -5.846262 | 1.000000  |
| 118 | 1 | 0 | -1.227614 | -9.566234 | 1.000000  |
| 119 | 1 | 0 | 1.227614  | -9.566234 | 1.000000  |
| 120 | 1 | 0 | 7.670795  | -5.846262 | 1.000000  |
| 121 | 6 | 0 | 0.645200  | 0.000000  | -3.090000 |
| 122 | 6 | 0 | 1.476888  | -1.304061 | -3.090000 |
| 123 | 6 | 0 | 1.476888  | 1.304061  | -3.090000 |
| 124 | 9 | 0 | -0.135946 | 0.000000  | -4.194359 |
| 125 | 9 | 0 | -0.135946 | 0.000000  | -1.985641 |
| 126 | 9 | 0 | 0.648783  | -2.354625 | -3.090000 |
| 127 | 9 | 0 | 2.252758  | -1.359072 | -4.180655 |

|     |   |   |          |           |           |
|-----|---|---|----------|-----------|-----------|
| 128 | 9 | 0 | 2.252758 | -1.359072 | -1.999345 |
| 129 | 9 | 0 | 0.648783 | 2.354625  | -3.090000 |
| 130 | 9 | 0 | 2.254378 | 1.326634  | -4.180655 |
| 131 | 9 | 0 | 2.254378 | 1.326634  | -1.999345 |

---

### ***n*-fluoropentane**

---

| Center<br>Number | Atomic<br>Number | Atomic<br>Type | Coordinates (Angstroms) |           |          |
|------------------|------------------|----------------|-------------------------|-----------|----------|
|                  |                  |                | X                       | Y         | Z        |
| 1                | 6                | 0              | 1.423200                | 0.000000  | 1.000000 |
| 2                | 6                | 0              | 0.711600                | 1.232527  | 1.000000 |
| 3                | 6                | 0              | -0.711600               | 1.232527  | 1.000000 |
| 4                | 6                | 0              | -1.423200               | 0.000000  | 1.000000 |
| 5                | 6                | 0              | -0.711600               | -1.232527 | 1.000000 |
| 6                | 6                | 0              | 0.711600                | -1.232527 | 1.000000 |
| 7                | 6                | 0              | 2.842500                | 0.000000  | 1.000000 |
| 8                | 6                | 0              | 1.421250                | 2.461677  | 1.000000 |
| 9                | 6                | 0              | -1.421250               | 2.461677  | 1.000000 |
| 10               | 6                | 0              | -2.842500               | 0.000000  | 1.000000 |
| 11               | 6                | 0              | -1.421250               | -2.461677 | 1.000000 |
| 12               | 6                | 0              | 1.421250                | -2.461677 | 1.000000 |
| 13               | 6                | 0              | 3.553392                | -1.233398 | 1.000000 |
| 14               | 6                | 0              | 3.553392                | 1.233398  | 1.000000 |
| 15               | 6                | 0              | 2.844850                | 2.460629  | 1.000000 |
| 16               | 6                | 0              | 0.708542                | 3.694026  | 1.000000 |
| 17               | 6                | 0              | -0.708542               | 3.694026  | 1.000000 |
| 18               | 6                | 0              | -2.844850               | 2.460629  | 1.000000 |
| 19               | 6                | 0              | -3.553392               | 1.233398  | 1.000000 |
| 20               | 6                | 0              | -3.553392               | -1.233398 | 1.000000 |
| 21               | 6                | 0              | -2.844850               | -2.460629 | 1.000000 |
| 22               | 6                | 0              | -0.708542               | -3.694026 | 1.000000 |
| 23               | 6                | 0              | 0.708542                | -3.694026 | 1.000000 |
| 24               | 6                | 0              | 2.844850                | -2.460629 | 1.000000 |
| 25               | 6                | 0              | 4.980792                | -1.232765 | 1.000000 |
| 26               | 6                | 0              | 4.980792                | 1.232765  | 1.000000 |

|    |   |   |           |           |          |
|----|---|---|-----------|-----------|----------|
| 27 | 6 | 0 | 3.558002  | 3.697110  | 1.000000 |
| 28 | 6 | 0 | 1.422790  | 4.929875  | 1.000000 |
| 29 | 6 | 0 | -1.422790 | 4.929875  | 1.000000 |
| 30 | 6 | 0 | -3.558002 | 3.697110  | 1.000000 |
| 31 | 6 | 0 | -4.980792 | 1.232765  | 1.000000 |
| 32 | 6 | 0 | -4.980792 | -1.232765 | 1.000000 |
| 33 | 6 | 0 | -3.558002 | -3.697110 | 1.000000 |
| 34 | 6 | 0 | -1.422790 | -4.929875 | 1.000000 |
| 35 | 6 | 0 | 1.422790  | -4.929875 | 1.000000 |
| 36 | 6 | 0 | 3.558002  | -3.697110 | 1.000000 |
| 37 | 6 | 0 | 5.690400  | 0.000000  | 1.000000 |
| 38 | 6 | 0 | 2.845200  | 4.928031  | 1.000000 |
| 39 | 6 | 0 | -2.845200 | 4.928031  | 1.000000 |
| 40 | 6 | 0 | -5.690400 | 0.000000  | 1.000000 |
| 41 | 6 | 0 | -2.845200 | -4.928031 | 1.000000 |
| 42 | 6 | 0 | 2.845200  | -4.928031 | 1.000000 |
| 43 | 6 | 0 | 5.688001  | -2.463782 | 1.000000 |
| 44 | 6 | 0 | 5.688001  | 2.463782  | 1.000000 |
| 45 | 6 | 0 | 4.977698  | 3.694062  | 1.000000 |
| 46 | 6 | 0 | 0.710302  | 6.157844  | 1.000000 |
| 47 | 6 | 0 | -0.710302 | 6.157844  | 1.000000 |
| 48 | 6 | 0 | -4.977698 | 3.694062  | 1.000000 |
| 49 | 6 | 0 | -5.688001 | 2.463782  | 1.000000 |
| 50 | 6 | 0 | -5.688001 | -2.463782 | 1.000000 |
| 51 | 6 | 0 | -4.977698 | -3.694062 | 1.000000 |
| 52 | 6 | 0 | -0.710302 | -6.157844 | 1.000000 |
| 53 | 6 | 0 | 0.710302  | -6.157844 | 1.000000 |
| 54 | 6 | 0 | 4.977698  | -3.694062 | 1.000000 |
| 55 | 6 | 0 | 7.123200  | 0.000000  | 1.000000 |
| 56 | 6 | 0 | 3.561600  | 6.168872  | 1.000000 |
| 57 | 6 | 0 | -3.561600 | 6.168872  | 1.000000 |
| 58 | 6 | 0 | -7.123200 | 0.000000  | 1.000000 |
| 59 | 6 | 0 | -3.561600 | -6.168872 | 1.000000 |
| 60 | 6 | 0 | 3.561600  | -6.168872 | 1.000000 |
| 61 | 6 | 0 | 7.126173  | -2.454947 | 1.000000 |
| 62 | 6 | 0 | 7.126173  | 2.454947  | 1.000000 |
| 63 | 6 | 0 | 5.689133  | 4.943974  | 1.000000 |
| 64 | 6 | 0 | 1.437041  | 7.398921  | 1.000000 |



|     |   |   |           |           |          |
|-----|---|---|-----------|-----------|----------|
| 65  | 6 | 0 | -1.437041 | 7.398921  | 1.000000 |
| 66  | 6 | 0 | -5.689133 | 4.943974  | 1.000000 |
| 67  | 6 | 0 | -7.126173 | 2.454947  | 1.000000 |
| 68  | 6 | 0 | -7.126173 | -2.454947 | 1.000000 |
| 69  | 6 | 0 | -5.689133 | -4.943974 | 1.000000 |
| 70  | 6 | 0 | -1.437041 | -7.398921 | 1.000000 |
| 71  | 6 | 0 | 1.437041  | -7.398921 | 1.000000 |
| 72  | 6 | 0 | 5.689133  | -4.943974 | 1.000000 |
| 73  | 6 | 0 | 7.804018  | -1.241703 | 1.000000 |
| 74  | 6 | 0 | 7.804018  | 1.241703  | 1.000000 |
| 75  | 6 | 0 | 4.977355  | 6.137627  | 1.000000 |
| 76  | 6 | 0 | 2.826663  | 7.379329  | 1.000000 |
| 77  | 6 | 0 | -2.826663 | 7.379329  | 1.000000 |
| 78  | 6 | 0 | -4.977355 | 6.137627  | 1.000000 |
| 79  | 6 | 0 | -7.804018 | 1.241703  | 1.000000 |
| 80  | 6 | 0 | -7.804018 | -1.241703 | 1.000000 |
| 81  | 6 | 0 | -4.977355 | -6.137627 | 1.000000 |
| 82  | 6 | 0 | -2.826663 | -7.379329 | 1.000000 |
| 83  | 6 | 0 | 2.826663  | -7.379329 | 1.000000 |
| 84  | 6 | 0 | 4.977355  | -6.137627 | 1.000000 |
| 85  | 6 | 0 | 7.811121  | -3.725024 | 1.000000 |
| 86  | 6 | 0 | 7.811121  | 3.725024  | 1.000000 |
| 87  | 6 | 0 | 7.131526  | 4.902117  | 1.000000 |
| 88  | 6 | 0 | 0.679595  | 8.627141  | 1.000000 |
| 89  | 6 | 0 | -0.679595 | 8.627141  | 1.000000 |
| 90  | 6 | 0 | -7.131526 | 4.902117  | 1.000000 |
| 91  | 6 | 0 | -7.811121 | 3.725024  | 1.000000 |
| 92  | 6 | 0 | -7.811121 | -3.725024 | 1.000000 |
| 93  | 6 | 0 | -7.131526 | -4.902117 | 1.000000 |
| 94  | 6 | 0 | -0.679595 | -8.627141 | 1.000000 |
| 95  | 6 | 0 | 0.679595  | -8.627141 | 1.000000 |
| 96  | 6 | 0 | 7.131526  | -4.902117 | 1.000000 |
| 97  | 1 | 0 | 8.892018  | -1.240852 | 1.000000 |
| 98  | 1 | 0 | 8.892018  | 1.240852  | 1.000000 |
| 99  | 1 | 0 | 5.520618  | 7.080287  | 1.000000 |
| 100 | 1 | 0 | 3.371400  | 8.321139  | 1.000000 |
| 101 | 1 | 0 | -3.371400 | 8.321139  | 1.000000 |
| 102 | 1 | 0 | -5.520618 | 7.080287  | 1.000000 |

|     |   |   |           |           |           |
|-----|---|---|-----------|-----------|-----------|
| 103 | 1 | 0 | -8.892018 | 1.240852  | 1.000000  |
| 104 | 1 | 0 | -8.892018 | -1.240852 | 1.000000  |
| 105 | 1 | 0 | -5.520618 | -7.080287 | 1.000000  |
| 106 | 1 | 0 | -3.371400 | -8.321139 | 1.000000  |
| 107 | 1 | 0 | 3.371400  | -8.321139 | 1.000000  |
| 108 | 1 | 0 | 5.520618  | -7.080287 | 1.000000  |
| 109 | 1 | 0 | 8.898409  | -3.719972 | 1.000000  |
| 110 | 1 | 0 | 8.898409  | 3.719972  | 1.000000  |
| 111 | 1 | 0 | 7.670795  | 5.846262  | 1.000000  |
| 112 | 1 | 0 | 1.227614  | 9.566234  | 1.000000  |
| 113 | 1 | 0 | -1.227614 | 9.566234  | 1.000000  |
| 114 | 1 | 0 | -7.670795 | 5.846262  | 1.000000  |
| 115 | 1 | 0 | -8.898409 | 3.719972  | 1.000000  |
| 116 | 1 | 0 | -8.898409 | -3.719972 | 1.000000  |
| 117 | 1 | 0 | -7.670795 | -5.846262 | 1.000000  |
| 118 | 1 | 0 | -1.227614 | -9.566234 | 1.000000  |
| 119 | 1 | 0 | 1.227614  | -9.566234 | 1.000000  |
| 120 | 1 | 0 | 7.670795  | -5.846262 | 1.000000  |
| 121 | 6 | 0 | 0.645200  | 0.000000  | -3.120000 |
| 122 | 6 | 0 | 1.486425  | -1.305431 | -3.120000 |
| 123 | 6 | 0 | 1.486425  | 1.305431  | -3.120000 |
| 124 | 6 | 0 | 0.643574  | -2.609932 | -3.120000 |
| 125 | 6 | 0 | 0.643574  | 2.609932  | -3.120000 |
| 126 | 9 | 0 | -0.139795 | 0.000000  | -4.224204 |
| 127 | 9 | 0 | -0.139795 | 0.000000  | -2.015796 |
| 128 | 9 | 0 | 2.267443  | -1.324745 | -4.224035 |
| 129 | 9 | 0 | 2.267443  | -1.324745 | -2.015965 |
| 130 | 9 | 0 | 2.267443  | 1.324745  | -2.015965 |
| 131 | 9 | 0 | 2.267443  | 1.324745  | -4.224035 |
| 132 | 9 | 0 | -0.129837 | -2.670325 | -4.210766 |
| 133 | 9 | 0 | -0.129837 | -2.670325 | -2.029234 |
| 134 | 9 | 0 | 1.477757  | -3.656699 | -3.120000 |
| 135 | 9 | 0 | -0.129837 | 2.670325  | -2.029234 |
| 136 | 9 | 0 | -0.129837 | 2.670325  | -4.210766 |
| 137 | 9 | 0 | 1.477757  | 3.656699  | -3.120000 |

---

## *n*-fluoroheptane

---

| Center<br>Number | Atomic<br>Number | Atomic<br>Type | Coordinates (Angstroms) |           |          |
|------------------|------------------|----------------|-------------------------|-----------|----------|
|                  |                  |                | X                       | Y         | Z        |
| 1                | 6                | 0              | 1.423200                | 0.000000  | 1.000000 |
| 2                | 6                | 0              | 0.711600                | 1.232527  | 1.000000 |
| 3                | 6                | 0              | -0.711600               | 1.232527  | 1.000000 |
| 4                | 6                | 0              | -1.423200               | 0.000000  | 1.000000 |
| 5                | 6                | 0              | -0.711600               | -1.232527 | 1.000000 |
| 6                | 6                | 0              | 0.711600                | -1.232527 | 1.000000 |
| 7                | 6                | 0              | 2.842500                | 0.000000  | 1.000000 |
| 8                | 6                | 0              | 1.421250                | 2.461677  | 1.000000 |
| 9                | 6                | 0              | -1.421250               | 2.461677  | 1.000000 |
| 10               | 6                | 0              | -2.842500               | 0.000000  | 1.000000 |
| 11               | 6                | 0              | -1.421250               | -2.461677 | 1.000000 |
| 12               | 6                | 0              | 1.421250                | -2.461677 | 1.000000 |
| 13               | 6                | 0              | 3.553392                | -1.233398 | 1.000000 |
| 14               | 6                | 0              | 3.553392                | 1.233398  | 1.000000 |
| 15               | 6                | 0              | 2.844850                | 2.460629  | 1.000000 |
| 16               | 6                | 0              | 0.708542                | 3.694026  | 1.000000 |
| 17               | 6                | 0              | -0.708542               | 3.694026  | 1.000000 |
| 18               | 6                | 0              | -2.844850               | 2.460629  | 1.000000 |
| 19               | 6                | 0              | -3.553392               | 1.233398  | 1.000000 |
| 20               | 6                | 0              | -3.553392               | -1.233398 | 1.000000 |
| 21               | 6                | 0              | -2.844850               | -2.460629 | 1.000000 |
| 22               | 6                | 0              | -0.708542               | -3.694026 | 1.000000 |
| 23               | 6                | 0              | 0.708542                | -3.694026 | 1.000000 |
| 24               | 6                | 0              | 2.844850                | -2.460629 | 1.000000 |
| 25               | 6                | 0              | 4.980792                | -1.232765 | 1.000000 |
| 26               | 6                | 0              | 4.980792                | 1.232765  | 1.000000 |
| 27               | 6                | 0              | 3.558002                | 3.697110  | 1.000000 |
| 28               | 6                | 0              | 1.422790                | 4.929875  | 1.000000 |
| 29               | 6                | 0              | -1.422790               | 4.929875  | 1.000000 |
| 30               | 6                | 0              | -3.558002               | 3.697110  | 1.000000 |
| 31               | 6                | 0              | -4.980792               | 1.232765  | 1.000000 |
| 32               | 6                | 0              | -4.980792               | -1.232765 | 1.000000 |
| 33               | 6                | 0              | -3.558002               | -3.697110 | 1.000000 |

---

|    |   |   |           |           |          |
|----|---|---|-----------|-----------|----------|
| 34 | 6 | 0 | -1.422790 | -4.929875 | 1.000000 |
| 35 | 6 | 0 | 1.422790  | -4.929875 | 1.000000 |
| 36 | 6 | 0 | 3.558002  | -3.697110 | 1.000000 |
| 37 | 6 | 0 | 5.690400  | 0.000000  | 1.000000 |
| 38 | 6 | 0 | 2.845200  | 4.928031  | 1.000000 |
| 39 | 6 | 0 | -2.845200 | 4.928031  | 1.000000 |
| 40 | 6 | 0 | -5.690400 | 0.000000  | 1.000000 |
| 41 | 6 | 0 | -2.845200 | -4.928031 | 1.000000 |
| 42 | 6 | 0 | 2.845200  | -4.928031 | 1.000000 |
| 43 | 6 | 0 | 5.688001  | -2.463782 | 1.000000 |
| 44 | 6 | 0 | 5.688001  | 2.463782  | 1.000000 |
| 45 | 6 | 0 | 4.977698  | 3.694062  | 1.000000 |
| 46 | 6 | 0 | 0.710302  | 6.157844  | 1.000000 |
| 47 | 6 | 0 | -0.710302 | 6.157844  | 1.000000 |
| 48 | 6 | 0 | -4.977698 | 3.694062  | 1.000000 |
| 49 | 6 | 0 | -5.688001 | 2.463782  | 1.000000 |
| 50 | 6 | 0 | -5.688001 | -2.463782 | 1.000000 |
| 51 | 6 | 0 | -4.977698 | -3.694062 | 1.000000 |
| 52 | 6 | 0 | -0.710302 | -6.157844 | 1.000000 |
| 53 | 6 | 0 | 0.710302  | -6.157844 | 1.000000 |
| 54 | 6 | 0 | 4.977698  | -3.694062 | 1.000000 |
| 55 | 6 | 0 | 7.123200  | 0.000000  | 1.000000 |
| 56 | 6 | 0 | 3.561600  | 6.168872  | 1.000000 |
| 57 | 6 | 0 | -3.561600 | 6.168872  | 1.000000 |
| 58 | 6 | 0 | -7.123200 | 0.000000  | 1.000000 |
| 59 | 6 | 0 | -3.561600 | -6.168872 | 1.000000 |
| 60 | 6 | 0 | 3.561600  | -6.168872 | 1.000000 |
| 61 | 6 | 0 | 7.126173  | -2.454947 | 1.000000 |
| 62 | 6 | 0 | 7.126173  | 2.454947  | 1.000000 |
| 63 | 6 | 0 | 5.689133  | 4.943974  | 1.000000 |
| 64 | 6 | 0 | 1.437041  | 7.398921  | 1.000000 |
| 65 | 6 | 0 | -1.437041 | 7.398921  | 1.000000 |
| 66 | 6 | 0 | -5.689133 | 4.943974  | 1.000000 |
| 67 | 6 | 0 | -7.126173 | 2.454947  | 1.000000 |
| 68 | 6 | 0 | -7.126173 | -2.454947 | 1.000000 |
| 69 | 6 | 0 | -5.689133 | -4.943974 | 1.000000 |
| 70 | 6 | 0 | -1.437041 | -7.398921 | 1.000000 |
| 71 | 6 | 0 | 1.437041  | -7.398921 | 1.000000 |

|     |   |   |           |           |          |
|-----|---|---|-----------|-----------|----------|
| 72  | 6 | 0 | 5.689133  | -4.943974 | 1.000000 |
| 73  | 6 | 0 | 7.804018  | -1.241703 | 1.000000 |
| 74  | 6 | 0 | 7.804018  | 1.241703  | 1.000000 |
| 75  | 6 | 0 | 4.977355  | 6.137627  | 1.000000 |
| 76  | 6 | 0 | 2.826663  | 7.379329  | 1.000000 |
| 77  | 6 | 0 | -2.826663 | 7.379329  | 1.000000 |
| 78  | 6 | 0 | -4.977355 | 6.137627  | 1.000000 |
| 79  | 6 | 0 | -7.804018 | 1.241703  | 1.000000 |
| 80  | 6 | 0 | -7.804018 | -1.241703 | 1.000000 |
| 81  | 6 | 0 | -4.977355 | -6.137627 | 1.000000 |
| 82  | 6 | 0 | -2.826663 | -7.379329 | 1.000000 |
| 83  | 6 | 0 | 2.826663  | -7.379329 | 1.000000 |
| 84  | 6 | 0 | 4.977355  | -6.137627 | 1.000000 |
| 85  | 6 | 0 | 7.811121  | -3.725024 | 1.000000 |
| 86  | 6 | 0 | 7.811121  | 3.725024  | 1.000000 |
| 87  | 6 | 0 | 7.131526  | 4.902117  | 1.000000 |
| 88  | 6 | 0 | 0.679595  | 8.627141  | 1.000000 |
| 89  | 6 | 0 | -0.679595 | 8.627141  | 1.000000 |
| 90  | 6 | 0 | -7.131526 | 4.902117  | 1.000000 |
| 91  | 6 | 0 | -7.811121 | 3.725024  | 1.000000 |
| 92  | 6 | 0 | -7.811121 | -3.725024 | 1.000000 |
| 93  | 6 | 0 | -7.131526 | -4.902117 | 1.000000 |
| 94  | 6 | 0 | -0.679595 | -8.627141 | 1.000000 |
| 95  | 6 | 0 | 0.679595  | -8.627141 | 1.000000 |
| 96  | 6 | 0 | 7.131526  | -4.902117 | 1.000000 |
| 97  | 1 | 0 | 8.892018  | -1.240852 | 1.000000 |
| 98  | 1 | 0 | 8.892018  | 1.240852  | 1.000000 |
| 99  | 1 | 0 | 5.520618  | 7.080287  | 1.000000 |
| 100 | 1 | 0 | 3.371400  | 8.321139  | 1.000000 |
| 101 | 1 | 0 | -3.371400 | 8.321139  | 1.000000 |
| 102 | 1 | 0 | -5.520618 | 7.080287  | 1.000000 |
| 103 | 1 | 0 | -8.892018 | 1.240852  | 1.000000 |
| 104 | 1 | 0 | -8.892018 | -1.240852 | 1.000000 |
| 105 | 1 | 0 | -5.520618 | -7.080287 | 1.000000 |
| 106 | 1 | 0 | -3.371400 | -8.321139 | 1.000000 |
| 107 | 1 | 0 | 3.371400  | -8.321139 | 1.000000 |
| 108 | 1 | 0 | 5.520618  | -7.080287 | 1.000000 |
| 109 | 1 | 0 | 8.898409  | -3.719972 | 1.000000 |

|     |   |   |           |           |           |
|-----|---|---|-----------|-----------|-----------|
| 110 | 1 | 0 | 8.898409  | 3.719972  | 1.000000  |
| 111 | 1 | 0 | 7.670795  | 5.846262  | 1.000000  |
| 112 | 1 | 0 | 1.227614  | 9.566234  | 1.000000  |
| 113 | 1 | 0 | -1.227614 | 9.566234  | 1.000000  |
| 114 | 1 | 0 | -7.670795 | 5.846262  | 1.000000  |
| 115 | 1 | 0 | -8.898409 | 3.719972  | 1.000000  |
| 116 | 1 | 0 | -8.898409 | -3.719972 | 1.000000  |
| 117 | 1 | 0 | -7.670795 | -5.846262 | 1.000000  |
| 118 | 1 | 0 | -1.227614 | -9.566234 | 1.000000  |
| 119 | 1 | 0 | 1.227614  | -9.566234 | 1.000000  |
| 120 | 1 | 0 | 7.670795  | -5.846262 | 1.000000  |
| 121 | 6 | 0 | 0.645200  | 0.000000  | -3.130000 |
| 122 | 6 | 0 | 1.495986  | -1.307341 | -3.130000 |
| 123 | 6 | 0 | 1.495986  | 1.307341  | -3.130000 |
| 124 | 6 | 0 | 0.651492  | -2.613399 | -3.130000 |
| 125 | 6 | 0 | 0.651492  | 2.613399  | -3.130000 |
| 126 | 6 | 0 | 1.494467  | -3.918177 | -3.130000 |
| 127 | 6 | 0 | 1.494467  | 3.918177  | -3.130000 |
| 128 | 9 | 0 | -0.136217 | 0.000000  | -4.234412 |
| 129 | 9 | 0 | -0.136217 | 0.000000  | -2.025588 |
| 130 | 9 | 0 | 2.278837  | -1.313592 | -4.234114 |
| 131 | 9 | 0 | 2.278837  | -1.313592 | -2.025886 |
| 132 | 9 | 0 | 2.278837  | 1.313592  | -2.025886 |
| 133 | 9 | 0 | 2.278837  | 1.313592  | -4.234114 |
| 134 | 9 | 0 | -0.129255 | -2.634923 | -4.234064 |
| 135 | 9 | 0 | -0.129255 | -2.634923 | -2.025936 |
| 136 | 9 | 0 | -0.129255 | 2.634923  | -2.025936 |
| 137 | 9 | 0 | -0.129255 | 2.634923  | -4.234064 |
| 138 | 9 | 0 | 0.659147  | -4.964421 | -3.130000 |
| 139 | 9 | 0 | 2.267735  | -3.979744 | -2.039198 |
| 140 | 9 | 0 | 2.267735  | -3.979744 | -4.220802 |
| 141 | 9 | 0 | 0.659147  | 4.964421  | -3.130000 |
| 142 | 9 | 0 | 2.267735  | 3.979744  | -4.220802 |
| 143 | 9 | 0 | 2.267735  | 3.979744  | -2.039198 |

---

## XYZ coordinates of each optimized geometry on C<sub>54</sub>H<sub>18</sub>

### propane

| Center<br>Number | Atomic<br>Number | Atomic<br>Type | Coordinates (Angstroms) |           |           |
|------------------|------------------|----------------|-------------------------|-----------|-----------|
|                  |                  |                | X                       | Y         | Z         |
| 1                | 6                | 0              | -1.329143               | -0.019410 | -0.282007 |
| 2                | 6                | 0              | -2.757188               | -0.040143 | -0.319518 |
| 3                | 6                | 0              | -3.483578               | 1.179865  | -0.338153 |
| 4                | 6                | 0              | -3.447912               | -1.280681 | -0.338033 |
| 5                | 6                | 0              | -4.913267               | 1.153718  | -0.375685 |
| 6                | 6                | 0              | -4.877758               | -1.295987 | -0.375563 |
| 7                | 6                | 0              | -5.575278               | -0.080990 | -0.393467 |
| 8                | 6                | 0              | -5.616653               | 2.406764  | -0.393729 |
| 9                | 6                | 0              | -5.544529               | -2.568896 | -0.393483 |
| 10               | 1                | 0              | -6.662857               | -0.096755 | -0.422014 |
| 11               | 1                | 0              | -6.703408               | 2.386452  | -0.422257 |
| 12               | 1                | 0              | -6.631416               | -2.580096 | -0.422012 |
| 13               | 6                | 0              | -0.601930               | -1.238152 | -0.263291 |
| 14               | 6                | 0              | -1.298072               | -2.485705 | -0.282039 |
| 15               | 6                | 0              | -2.717442               | -2.504988 | -0.319263 |
| 16               | 6                | 0              | -0.569447               | -3.704381 | -0.263298 |
| 17               | 6                | 0              | -3.409639               | -3.756636 | -0.337849 |
| 18               | 6                | 0              | -1.271108               | -4.950743 | -0.282122 |
| 19               | 6                | 0              | -2.671721               | -4.947514 | -0.318878 |
| 20               | 6                | 0              | -4.846124               | -3.739463 | -0.375542 |
| 21               | 6                | 0              | -0.502499               | -6.164848 | -0.262352 |
| 22               | 1                | 0              | -3.201854               | -5.897592 | -0.333106 |
| 23               | 1                | 0              | -5.371910               | -4.691099 | -0.389656 |
| 24               | 1                | 0              | -1.036237               | -7.112042 | -0.276672 |
| 25               | 6                | 0              | 0.816683                | -1.217586 | -0.226060 |
| 26               | 6                | 0              | 1.548686                | -2.444442 | -0.207306 |
| 27               | 6                | 0              | 0.855697                | -3.683721 | -0.225891 |
| 28               | 6                | 0              | 2.968025                | -2.422569 | -0.170034 |
| 29               | 6                | 0              | 1.593188                | -4.909220 | -0.206938 |
| 30               | 6                | 0              | 3.696211                | -3.653624 | -0.151331 |
| 31               | 6                | 0              | 2.993119                | -4.865393 | -0.170184 |

|    |   |   |           |           |           |
|----|---|---|-----------|-----------|-----------|
| 32 | 6 | 0 | 0.860092  | -6.145094 | -0.226586 |
| 33 | 6 | 0 | 5.131594  | -3.594820 | -0.113641 |
| 34 | 1 | 0 | 3.550566  | -5.799706 | -0.155864 |
| 35 | 1 | 0 | 1.421060  | -7.076419 | -0.212173 |
| 36 | 1 | 0 | 5.684740  | -4.530814 | -0.099435 |
| 37 | 6 | 0 | 1.508219  | 0.021709  | -0.207553 |
| 38 | 6 | 0 | 2.936313  | 0.042401  | -0.170070 |
| 39 | 6 | 0 | 3.662701  | -1.177601 | -0.151395 |
| 40 | 6 | 0 | 3.627035  | 1.282945  | -0.151512 |
| 41 | 6 | 0 | 5.092391  | -1.151454 | -0.113862 |
| 42 | 6 | 0 | 5.056881  | 1.298250  | -0.113982 |
| 43 | 6 | 0 | 5.754401  | 0.083253  | -0.096079 |
| 44 | 6 | 0 | 5.795777  | -2.404500 | -0.095816 |
| 45 | 6 | 0 | 5.723653  | 2.571160  | -0.096062 |
| 46 | 1 | 0 | 6.841981  | 0.099019  | -0.067532 |
| 47 | 1 | 0 | 6.882531  | -2.384188 | -0.067290 |
| 48 | 1 | 0 | 6.810540  | 2.582359  | -0.067534 |
| 49 | 6 | 0 | 0.781063  | 1.240454  | -0.226152 |
| 50 | 6 | 0 | 1.477185  | 2.487975  | -0.207543 |
| 51 | 6 | 0 | 2.896566  | 2.507251  | -0.170278 |
| 52 | 6 | 0 | 0.748573  | 3.706644  | -0.226255 |
| 53 | 6 | 0 | 3.588763  | 3.758899  | -0.151697 |
| 54 | 6 | 0 | 1.450232  | 4.953007  | -0.207425 |
| 55 | 6 | 0 | 2.850845  | 4.949777  | -0.170669 |
| 56 | 6 | 0 | 5.025247  | 3.741727  | -0.114003 |
| 57 | 6 | 0 | 0.681622  | 6.167111  | -0.227194 |
| 58 | 1 | 0 | 3.380978  | 5.899855  | -0.156441 |
| 59 | 1 | 0 | 5.551033  | 4.693362  | -0.099890 |
| 60 | 1 | 0 | 1.215362  | 7.114306  | -0.212873 |
| 61 | 6 | 0 | -0.637510 | 1.219776  | -0.263437 |
| 62 | 6 | 0 | -1.369561 | 2.446705  | -0.282292 |
| 63 | 6 | 0 | -0.676574 | 3.685984  | -0.263660 |
| 64 | 6 | 0 | -2.788901 | 2.424832  | -0.319512 |
| 65 | 6 | 0 | -1.414065 | 4.911485  | -0.282608 |
| 66 | 6 | 0 | -3.517086 | 3.655888  | -0.338216 |
| 67 | 6 | 0 | -2.813995 | 4.867657  | -0.319363 |
| 68 | 6 | 0 | -0.680968 | 6.147357  | -0.262959 |
| 69 | 6 | 0 | -4.952470 | 3.597084  | -0.375905 |



|    |   |   |           |           |           |
|----|---|---|-----------|-----------|-----------|
| 70 | 1 | 0 | -3.371442 | 5.801969  | -0.333683 |
| 71 | 1 | 0 | -1.241936 | 7.078683  | -0.277374 |
| 72 | 1 | 0 | -5.505617 | 4.533078  | -0.390112 |
| 73 | 6 | 0 | -0.588606 | -0.004645 | 3.211574  |
| 74 | 1 | 0 | 0.052959  | 0.006699  | 2.323113  |
| 75 | 1 | 0 | 0.088086  | 0.007014  | 4.077143  |
| 76 | 6 | 0 | -1.416785 | -1.293130 | 3.223882  |
| 77 | 1 | 0 | -2.026720 | -1.361346 | 4.133669  |
| 78 | 1 | 0 | -2.097023 | -1.328437 | 2.365862  |
| 79 | 6 | 0 | -1.461065 | 1.254281  | 3.224118  |
| 80 | 1 | 0 | -2.141719 | 1.266317  | 2.365782  |
| 81 | 1 | 0 | -2.073420 | 1.300845  | 4.133646  |
| 82 | 1 | 0 | -0.854585 | 2.166200  | 3.178317  |
| 83 | 1 | 0 | -0.779011 | -2.183407 | 3.177381  |

## fluoropropane

| Center<br>Number | Atomic<br>Number | Atomic<br>Type | Coordinates (Angstroms) |           |           |
|------------------|------------------|----------------|-------------------------|-----------|-----------|
|                  |                  |                | X                       | Y         | Z         |
| 1                | 6                | 0              | 1.079420                | 0.178362  | -0.974740 |
| 2                | 6                | 0              | 2.477127                | 0.431885  | -1.127100 |
| 3                | 6                | 0              | 3.390343                | -0.653155 | -1.200100 |
| 4                | 6                | 0              | 2.951154                | 1.768035  | -1.204972 |
| 5                | 6                | 0              | 4.788899                | -0.394352 | -1.352548 |
| 6                | 6                | 0              | 4.351543                | 2.016303  | -1.357470 |
| 7                | 6                | 0              | 5.235570                | 0.931567  | -1.427573 |
| 8                | 6                | 0              | 5.684920                | -1.515615 | -1.423163 |
| 9                | 6                | 0              | 4.796628                | 3.380631  | -1.433054 |
| 10               | 1                | 0              | 6.300105                | 1.124464  | -1.543535 |
| 11               | 1                | 0              | 6.747897                | -1.318369 | -1.539084 |
| 12               | 1                | 0              | 5.861230                | 3.568911  | -1.548958 |
| 13               | 6                | 0              | 0.165583                | 1.262053  | -0.901354 |
| 14               | 6                | 0              | 0.643754                | 2.606111  | -0.980121 |
| 15               | 6                | 0              | 2.033216                | 2.856597  | -1.131457 |
| 16               | 6                | 0              | -0.271445               | 3.689422  | -0.906733 |

|    |   |   |           |           |           |
|----|---|---|-----------|-----------|-----------|
| 17 | 6 | 0 | 2.506742  | 4.204099  | -1.209668 |
| 18 | 6 | 0 | 0.212236  | 5.033254  | -0.985916 |
| 19 | 6 | 0 | 1.587034  | 5.258458  | -1.135213 |
| 20 | 6 | 0 | 3.919028  | 4.421398  | -1.362739 |
| 21 | 6 | 0 | -0.741400 | 6.105518  | -0.908270 |
| 22 | 1 | 0 | 1.951093  | 6.282064  | -1.195082 |
| 23 | 1 | 0 | 4.278566  | 5.445832  | -1.422151 |
| 24 | 1 | 0 | -0.373329 | 7.126868  | -0.968514 |
| 25 | 6 | 0 | -1.222839 | 1.010395  | -0.750089 |
| 26 | 6 | 0 | -2.142740 | 2.101208  | -0.676494 |
| 27 | 6 | 0 | -1.666387 | 3.436653  | -0.754721 |
| 28 | 6 | 0 | -3.531768 | 1.848205  | -0.525077 |
| 29 | 6 | 0 | -2.591362 | 4.525232  | -0.680430 |
| 30 | 6 | 0 | -4.448527 | 2.943781  | -0.451808 |
| 31 | 6 | 0 | -3.957760 | 4.253723  | -0.531041 |
| 32 | 6 | 0 | -2.075115 | 5.863844  | -0.762947 |
| 33 | 6 | 0 | -5.847248 | 2.651717  | -0.298586 |
| 34 | 1 | 0 | -4.658233 | 5.084431  | -0.474917 |
| 35 | 1 | 0 | -2.778552 | 6.691032  | -0.706438 |
| 36 | 1 | 0 | -6.543781 | 3.484786  | -0.242927 |
| 37 | 6 | 0 | -1.697816 | -0.324799 | -0.672107 |
| 38 | 6 | 0 | -3.095647 | -0.578079 | -0.519766 |
| 39 | 6 | 0 | -4.008824 | 0.506887  | -0.446636 |
| 40 | 6 | 0 | -3.569549 | -1.914387 | -0.441741 |
| 41 | 6 | 0 | -5.407327 | 0.247966  | -0.294132 |
| 42 | 6 | 0 | -4.969986 | -2.162641 | -0.289263 |
| 43 | 6 | 0 | -5.854016 | -1.077904 | -0.219200 |
| 44 | 6 | 0 | -6.303364 | 1.369278  | -0.223578 |
| 45 | 6 | 0 | -5.415071 | -3.526969 | -0.213687 |
| 46 | 1 | 0 | -6.918549 | -1.270799 | -0.103206 |
| 47 | 1 | 0 | -7.366341 | 1.172032  | -0.107658 |
| 48 | 1 | 0 | -6.479673 | -3.715248 | -0.097783 |
| 49 | 6 | 0 | -0.784084 | -1.408398 | -0.745221 |
| 50 | 6 | 0 | -1.262143 | -2.752470 | -0.666672 |
| 51 | 6 | 0 | -2.651659 | -3.002934 | -0.515285 |
| 52 | 6 | 0 | -0.347002 | -3.835759 | -0.740031 |
| 53 | 6 | 0 | -3.125184 | -4.350436 | -0.437072 |
| 54 | 6 | 0 | -0.830680 | -5.179591 | -0.660826 |

|    |   |   |           |           |           |
|----|---|---|-----------|-----------|-----------|
| 55 | 6 | 0 | -2.205478 | -5.404794 | -0.511529 |
| 56 | 6 | 0 | -4.537471 | -4.567736 | -0.284002 |
| 57 | 6 | 0 | 0.122957  | -6.251853 | -0.738472 |
| 58 | 1 | 0 | -2.569538 | -6.428399 | -0.451659 |
| 59 | 1 | 0 | -4.897008 | -5.592169 | -0.224591 |
| 60 | 1 | 0 | -0.245115 | -7.273203 | -0.678228 |
| 61 | 6 | 0 | 0.604408  | -1.156683 | -0.896526 |
| 62 | 6 | 0 | 1.524260  | -2.247522 | -0.970369 |
| 63 | 6 | 0 | 1.047944  | -3.582990 | -0.892018 |
| 64 | 6 | 0 | 2.913341  | -1.994644 | -1.121598 |
| 65 | 6 | 0 | 1.972919  | -4.671570 | -0.966311 |
| 66 | 6 | 0 | 3.830100  | -3.090103 | -1.194925 |
| 67 | 6 | 0 | 3.339315  | -4.400060 | -1.115719 |
| 68 | 6 | 0 | 1.456671  | -6.010179 | -0.883795 |
| 69 | 6 | 0 | 5.228807  | -2.798053 | -1.348151 |
| 70 | 1 | 0 | 4.039790  | -5.230769 | -1.171825 |
| 71 | 1 | 0 | 2.160109  | -6.837368 | -0.940305 |
| 72 | 1 | 0 | 5.925337  | -3.631123 | -1.403815 |
| 73 | 6 | 0 | 0.596188  | 0.113181  | 3.172866  |
| 74 | 6 | 0 | 1.033674  | 1.581711  | 2.947661  |
| 75 | 6 | 0 | 1.763358  | -0.897825 | 3.266162  |
| 76 | 9 | 0 | 2.391457  | -0.998259 | 2.090394  |
| 77 | 9 | 0 | -0.201837 | -0.260692 | 2.151048  |
| 78 | 9 | 0 | 1.914075  | 1.659374  | 1.942270  |
| 79 | 9 | 0 | 2.641733  | -0.499198 | 4.199717  |
| 80 | 9 | 0 | -0.103791 | 0.058843  | 4.330395  |
| 81 | 9 | 0 | 1.603416  | 2.064466  | 4.060629  |
| 82 | 9 | 0 | 1.281644  | -2.099248 | 3.606751  |
| 83 | 9 | 0 | -0.038420 | 2.323736  | 2.649090  |

---

XYZ coordinates of molecules at an initial position for horizontal displacement on  $C_{54}H_{18}$

**propane**

| Center<br>Number | Atomic<br>Number | Atomic<br>Type | Coordinates (Angstroms) |           |          |
|------------------|------------------|----------------|-------------------------|-----------|----------|
|                  |                  |                | X                       | Y         | Z        |
| 1                | 6                | 0              | 1.419200                | 0.000000  | 1.000000 |
| 2                | 6                | 0              | 2.848000                | 0.000000  | 1.000000 |
| 3                | 6                | 0              | 3.556875                | -1.230405 | 1.000000 |
| 4                | 6                | 0              | 3.556875                | 1.230405  | 1.000000 |
| 5                | 6                | 0              | 4.987265                | -1.224985 | 1.000000 |
| 6                | 6                | 0              | 4.987265                | 1.224985  | 1.000000 |
| 7                | 6                | 0              | 5.667400                | 0.000000  | 1.000000 |
| 8                | 6                | 0              | 5.672661                | -2.488111 | 1.000000 |
| 9                | 6                | 0              | 5.672661                | 2.488111  | 1.000000 |
| 10               | 1                | 0              | 6.755500                | 0.000000  | 1.000000 |
| 11               | 1                | 0              | 6.759952                | -2.483557 | 1.000000 |
| 12               | 1                | 0              | 6.759952                | 2.483557  | 1.000000 |
| 13               | 6                | 0              | 0.709600                | 1.229063  | 1.000000 |
| 14               | 6                | 0              | 1.424000                | 2.466440  | 1.000000 |
| 15               | 6                | 0              | 2.843999                | 2.465142  | 1.000000 |
| 16               | 6                | 0              | 0.712876                | 3.695547  | 1.000000 |
| 17               | 6                | 0              | 3.554500                | 3.706606  | 1.000000 |
| 18               | 6                | 0              | 1.432764                | 4.931590  | 1.000000 |
| 19               | 6                | 0              | 2.833700                | 4.908112  | 1.000000 |
| 20               | 6                | 0              | 4.991098                | 3.668613  | 1.000000 |
| 21               | 6                | 0              | 0.681563                | 6.156724  | 1.000000 |
| 22               | 1                | 0              | 3.377750                | 5.850435  | 1.000000 |
| 23               | 1                | 0              | 5.530799                | 4.612511  | 1.000000 |
| 24               | 1                | 0              | 1.229152                | 7.096068  | 1.000000 |
| 25               | 6                | 0              | -0.709600               | 1.229063  | 1.000000 |
| 26               | 6                | 0              | -1.424000               | 2.466440  | 1.000000 |
| 27               | 6                | 0              | -0.712876               | 3.695547  | 1.000000 |
| 28               | 6                | 0              | -2.843999               | 2.465142  | 1.000000 |
| 29               | 6                | 0              | -1.432764               | 4.931590  | 1.000000 |
| 30               | 6                | 0              | -3.554500               | 3.706606  | 1.000000 |

|    |   |   |           |           |          |
|----|---|---|-----------|-----------|----------|
| 31 | 6 | 0 | -2.833700 | 4.908112  | 1.000000 |
| 32 | 6 | 0 | -0.681563 | 6.156724  | 1.000000 |
| 33 | 6 | 0 | -4.991098 | 3.668613  | 1.000000 |
| 34 | 1 | 0 | -3.377750 | 5.850435  | 1.000000 |
| 35 | 1 | 0 | -1.229152 | 7.096068  | 1.000000 |
| 36 | 1 | 0 | -5.530799 | 4.612511  | 1.000000 |
| 37 | 6 | 0 | -1.419200 | 0.000000  | 1.000000 |
| 38 | 6 | 0 | -2.848000 | 0.000000  | 1.000000 |
| 39 | 6 | 0 | -3.556875 | 1.230405  | 1.000000 |
| 40 | 6 | 0 | -3.556875 | -1.230405 | 1.000000 |
| 41 | 6 | 0 | -4.987265 | 1.224985  | 1.000000 |
| 42 | 6 | 0 | -4.987265 | -1.224985 | 1.000000 |
| 43 | 6 | 0 | -5.667400 | 0.000000  | 1.000000 |
| 44 | 6 | 0 | -5.672661 | 2.488111  | 1.000000 |
| 45 | 6 | 0 | -5.672661 | -2.488111 | 1.000000 |
| 46 | 1 | 0 | -6.755500 | 0.000000  | 1.000000 |
| 47 | 1 | 0 | -6.759952 | 2.483557  | 1.000000 |
| 48 | 1 | 0 | -6.759952 | -2.483557 | 1.000000 |
| 49 | 6 | 0 | -0.709600 | -1.229063 | 1.000000 |
| 50 | 6 | 0 | -1.424000 | -2.466440 | 1.000000 |
| 51 | 6 | 0 | -2.843999 | -2.465142 | 1.000000 |
| 52 | 6 | 0 | -0.712876 | -3.695547 | 1.000000 |
| 53 | 6 | 0 | -3.554500 | -3.706606 | 1.000000 |
| 54 | 6 | 0 | -1.432764 | -4.931590 | 1.000000 |
| 55 | 6 | 0 | -2.833700 | -4.908112 | 1.000000 |
| 56 | 6 | 0 | -4.991098 | -3.668613 | 1.000000 |
| 57 | 6 | 0 | -0.681563 | -6.156724 | 1.000000 |
| 58 | 1 | 0 | -3.377750 | -5.850435 | 1.000000 |
| 59 | 1 | 0 | -5.530799 | -4.612511 | 1.000000 |
| 60 | 1 | 0 | -1.229152 | -7.096068 | 1.000000 |
| 61 | 6 | 0 | 0.709600  | -1.229063 | 1.000000 |
| 62 | 6 | 0 | 1.424000  | -2.466440 | 1.000000 |
| 63 | 6 | 0 | 0.712876  | -3.695547 | 1.000000 |
| 64 | 6 | 0 | 2.843999  | -2.465142 | 1.000000 |
| 65 | 6 | 0 | 1.432764  | -4.931590 | 1.000000 |
| 66 | 6 | 0 | 3.554500  | -3.706606 | 1.000000 |
| 67 | 6 | 0 | 2.833700  | -4.908112 | 1.000000 |
| 68 | 6 | 0 | 0.681563  | -6.156724 | 1.000000 |

|    |   |   |           |           |           |
|----|---|---|-----------|-----------|-----------|
| 69 | 6 | 0 | 4.991098  | -3.668613 | 1.000000  |
| 70 | 1 | 0 | 3.377750  | -5.850435 | 1.000000  |
| 71 | 1 | 0 | 1.229152  | -7.096068 | 1.000000  |
| 72 | 1 | 0 | 5.530799  | -4.612511 | 1.000000  |
| 73 | 6 | 0 | 0.641200  | 0.000000  | -2.500000 |
| 74 | 6 | 0 | 1.491030  | -1.275162 | -2.500000 |
| 75 | 6 | 0 | 1.491030  | 1.275162  | -2.500000 |
| 76 | 1 | 0 | -0.018533 | 0.000000  | -3.378325 |
| 77 | 1 | 0 | -0.018533 | 0.000000  | -1.621675 |
| 78 | 1 | 0 | 0.866970  | -2.176386 | -2.500000 |
| 79 | 1 | 0 | 2.138732  | -1.316125 | -3.384800 |
| 80 | 1 | 0 | 2.138732  | -1.316125 | -1.615200 |
| 81 | 1 | 0 | 0.866970  | 2.176386  | -2.500000 |
| 82 | 1 | 0 | 2.139359  | 1.245732  | -3.384800 |
| 83 | 1 | 0 | 2.139359  | 1.245732  | -1.615200 |

---

### fluoropropane

---

| Center<br>Number | Atomic<br>Number | Atomic<br>Type | Coordinates (Angstroms) |           |          |
|------------------|------------------|----------------|-------------------------|-----------|----------|
|                  |                  |                | X                       | Y         | Z        |
| 1                | 6                | 0              | 1.419200                | 0.000000  | 1.000000 |
| 2                | 6                | 0              | 2.848000                | 0.000000  | 1.000000 |
| 3                | 6                | 0              | 3.556875                | -1.230405 | 1.000000 |
| 4                | 6                | 0              | 3.556875                | 1.230405  | 1.000000 |
| 5                | 6                | 0              | 4.987265                | -1.224985 | 1.000000 |
| 6                | 6                | 0              | 4.987265                | 1.224985  | 1.000000 |
| 7                | 6                | 0              | 5.667400                | 0.000000  | 1.000000 |
| 8                | 6                | 0              | 5.672661                | -2.488111 | 1.000000 |
| 9                | 6                | 0              | 5.672661                | 2.488111  | 1.000000 |
| 10               | 1                | 0              | 6.755500                | 0.000000  | 1.000000 |
| 11               | 1                | 0              | 6.759952                | -2.483557 | 1.000000 |
| 12               | 1                | 0              | 6.759952                | 2.483557  | 1.000000 |
| 13               | 6                | 0              | 0.709600                | 1.229063  | 1.000000 |
| 14               | 6                | 0              | 1.424000                | 2.466440  | 1.000000 |
| 15               | 6                | 0              | 2.843999                | 2.465142  | 1.000000 |
| 16               | 6                | 0              | 0.712876                | 3.695547  | 1.000000 |

|    |   |   |           |           |          |
|----|---|---|-----------|-----------|----------|
| 17 | 6 | 0 | 3.554500  | 3.706606  | 1.000000 |
| 18 | 6 | 0 | 1.432764  | 4.931590  | 1.000000 |
| 19 | 6 | 0 | 2.833700  | 4.908112  | 1.000000 |
| 20 | 6 | 0 | 4.991098  | 3.668613  | 1.000000 |
| 21 | 6 | 0 | 0.681563  | 6.156724  | 1.000000 |
| 22 | 1 | 0 | 3.377750  | 5.850435  | 1.000000 |
| 23 | 1 | 0 | 5.530799  | 4.612511  | 1.000000 |
| 24 | 1 | 0 | 1.229152  | 7.096068  | 1.000000 |
| 25 | 6 | 0 | -0.709600 | 1.229063  | 1.000000 |
| 26 | 6 | 0 | -1.424000 | 2.466440  | 1.000000 |
| 27 | 6 | 0 | -0.712876 | 3.695547  | 1.000000 |
| 28 | 6 | 0 | -2.843999 | 2.465142  | 1.000000 |
| 29 | 6 | 0 | -1.432764 | 4.931590  | 1.000000 |
| 30 | 6 | 0 | -3.554500 | 3.706606  | 1.000000 |
| 31 | 6 | 0 | -2.833700 | 4.908112  | 1.000000 |
| 32 | 6 | 0 | -0.681563 | 6.156724  | 1.000000 |
| 33 | 6 | 0 | -4.991098 | 3.668613  | 1.000000 |
| 34 | 1 | 0 | -3.377750 | 5.850435  | 1.000000 |
| 35 | 1 | 0 | -1.229152 | 7.096068  | 1.000000 |
| 36 | 1 | 0 | -5.530799 | 4.612511  | 1.000000 |
| 37 | 6 | 0 | -1.419200 | 0.000000  | 1.000000 |
| 38 | 6 | 0 | -2.848000 | 0.000000  | 1.000000 |
| 39 | 6 | 0 | -3.556875 | 1.230405  | 1.000000 |
| 40 | 6 | 0 | -3.556875 | -1.230405 | 1.000000 |
| 41 | 6 | 0 | -4.987265 | 1.224985  | 1.000000 |
| 42 | 6 | 0 | -4.987265 | -1.224985 | 1.000000 |
| 43 | 6 | 0 | -5.667400 | 0.000000  | 1.000000 |
| 44 | 6 | 0 | -5.672661 | 2.488111  | 1.000000 |
| 45 | 6 | 0 | -5.672661 | -2.488111 | 1.000000 |
| 46 | 1 | 0 | -6.755500 | 0.000000  | 1.000000 |
| 47 | 1 | 0 | -6.759952 | 2.483557  | 1.000000 |
| 48 | 1 | 0 | -6.759952 | -2.483557 | 1.000000 |
| 49 | 6 | 0 | -0.709600 | -1.229063 | 1.000000 |
| 50 | 6 | 0 | -1.424000 | -2.466440 | 1.000000 |
| 51 | 6 | 0 | -2.843999 | -2.465142 | 1.000000 |
| 52 | 6 | 0 | -0.712876 | -3.695547 | 1.000000 |
| 53 | 6 | 0 | -3.554500 | -3.706606 | 1.000000 |
| 54 | 6 | 0 | -1.432764 | -4.931590 | 1.000000 |

|    |   |   |           |           |           |
|----|---|---|-----------|-----------|-----------|
| 55 | 6 | 0 | -2.833700 | -4.908112 | 1.000000  |
| 56 | 6 | 0 | -4.991098 | -3.668613 | 1.000000  |
| 57 | 6 | 0 | -0.681563 | -6.156724 | 1.000000  |
| 58 | 1 | 0 | -3.377750 | -5.850435 | 1.000000  |
| 59 | 1 | 0 | -5.530799 | -4.612511 | 1.000000  |
| 60 | 1 | 0 | -1.229152 | -7.096068 | 1.000000  |
| 61 | 6 | 0 | 0.709600  | -1.229063 | 1.000000  |
| 62 | 6 | 0 | 1.424000  | -2.466440 | 1.000000  |
| 63 | 6 | 0 | 0.712876  | -3.695547 | 1.000000  |
| 64 | 6 | 0 | 2.843999  | -2.465142 | 1.000000  |
| 65 | 6 | 0 | 1.432764  | -4.931590 | 1.000000  |
| 66 | 6 | 0 | 3.554500  | -3.706606 | 1.000000  |
| 67 | 6 | 0 | 2.833700  | -4.908112 | 1.000000  |
| 68 | 6 | 0 | 0.681563  | -6.156724 | 1.000000  |
| 69 | 6 | 0 | 4.991098  | -3.668613 | 1.000000  |
| 70 | 1 | 0 | 3.377750  | -5.850435 | 1.000000  |
| 71 | 1 | 0 | 1.229152  | -7.096068 | 1.000000  |
| 72 | 1 | 0 | 5.530799  | -4.612511 | 1.000000  |
| 73 | 6 | 0 | 0.641200  | 0.000000  | -3.090000 |
| 74 | 6 | 0 | 1.472888  | -1.304061 | -3.090000 |
| 75 | 6 | 0 | 1.472888  | 1.304061  | -3.090000 |
| 76 | 9 | 0 | -0.139946 | 0.000000  | -4.194359 |
| 77 | 9 | 0 | -0.139946 | 0.000000  | -1.985641 |
| 78 | 9 | 0 | 0.644783  | -2.354625 | -3.090000 |
| 79 | 9 | 0 | 2.248758  | -1.359072 | -4.180655 |
| 80 | 9 | 0 | 2.248758  | -1.359072 | -1.999345 |
| 81 | 9 | 0 | 0.644783  | 2.354625  | -3.090000 |
| 82 | 9 | 0 | 2.250378  | 1.326634  | -4.180655 |
| 83 | 9 | 0 | 2.250378  | 1.326634  | -1.999345 |

---
